# Supplementary material
Source: PubMed Central journal article supplement (PMC4813703)

## Supplemental Data

# Quantitative Mass Spectrometry Reveals that Intact Histone H1 Phosphorylations are Variant Specific and Exhibit Single Molecule Hierarchical Dependence

Yu Chen<sup>§||</sup>, Michael E. Hoover<sup>‡||</sup>, Xibei Dang<sup>¶||</sup>, Alan A. Shomo<sup>¶||</sup>, Xiaoyan Guan<sup>§</sup>, Alan G. Marshall<sup>§¶||</sup>, Michael A. Freitas<sup>‡\*</sup>, and Nicolas L. Young<sup>§\*</sup>

**Table S1.** Relative abundance of proteoforms at different cell cycle stages of two cell lines(%)

| Proteoforms | MDA-MB-231 |            |            | MCF-10A    |            |            |
|-------------|------------|------------|------------|------------|------------|------------|
|             | Asyn       | S phase    | M phase    | Asyn       | S phase    | M phase    |
| H12ac       | 16.9 ± 0.9 | 13.7 ± 1.0 | 10.5 ± 1.1 | 4.9 ± 0.6  | 4.5 ± 0.2  | 1.2 ± 0.2  |
| H12acph     | 8.1 ± 1.2  | 4.3 ± 0.4  | 6.3 ± 0.6  | 7.9 ± 1.1  | 2.3 ± 0.3  | 2.6 ± 0.5  |
| H12SNPac    | 0          | 0          | 0          | 4.4 ± 0.3  | 4.1 ± 0.3  | 2.2 ± 0.5  |
| H12SNPacph  | 0          | 0          | 0          | 6.1 ± 0.7  | 1.8 ± 0.2  | 2.6 ± 0.8  |
| H12SNPacph2 | 0          | 0          | 0          | 0          | 0          | 2.1 ± 0.2  |
| H13ac       | 0          | 0          | 0          | 4.6 ± 0.4  | 2.2 ± 0.2  | 2.4 ± 0.3  |
| H13acph     | 0          | 0          | 0          | 1.7 ± 0.5  | 1.2 ± 0.2  | 1.1 ± 0.1  |
| H14ac       | 35.6 ± 0.8 | 48.2 ± 1.8 | 27.5 ± 2.8 | 11.8 ± 2.4 | 38.9 ± 1.4 | 10.2 ± 2.2 |
| H14ph       | 2.3 ± 0.2  | 2.2 ± 0.1  | 1.6 ± 0.2  | 1.8 ± 0.4  | 3.8 ± 0.4  | 1.5 ± 0.4  |
| H14acph     | 24.5 ± 1.4 | 22.2 ± 1.0 | 20.1 ± 0.5 | 26.5 ± 2.1 | 24.7 ± 1.7 | 25.6 ± 2.1 |
| H14acph2    | 11.5 ± 0.8 | 8.7 ± 0.9  | 14.7 ± 2.0 | 22.3 ± 1.2 | 13.7 ± 0.7 | 26.6 ± 3.5 |
| H14acph3    | 1.0 ± 0.5  | 0.7 ± 0.2  | 11.3 ± 2.4 | 8.2 ± 1.9  | 2.8 ± 0.5  | 15.3 ± 3.7 |
| H14acph4    | 0          | 0          | 5.8 ± 0.7  | 0          | 0          | 5.4 ± 3.4  |
| H14acph5    | 0          | 0          | 2.1 ± 0.2  | 0          | 0          | 1.3 ± 0.2  |

**Table S2.** PTM identification on histone H1.2SNPA18VN $\alpha$ -ac

|             | <b>H12ac (<i>m/z</i>)</b> | <b>H12SNPac (<i>m/z</i>)</b> | <b><math>\Delta m/z</math></b> | <b><math>\Delta</math> mass (Da)</b> |
|-------------|---------------------------|------------------------------|--------------------------------|--------------------------------------|
| Asyn 1-1    | 608.86689                 | 609.66750                    | 0.80061                        | 28.02135                             |
| Asyn 1-2    | 608.86739                 | 609.66838                    | 0.80099                        | 28.03465                             |
| Asyn 1-3    | 608.86733                 | 609.66820                    | 0.80087                        | 28.03045                             |
| Asyn 2-1    | 608.86640                 | 609.66762                    | 0.80122                        | 28.04270                             |
| Asyn 2-2    | 608.86673                 | 609.66782                    | 0.80109                        | 28.03815                             |
| Asyn 2-3    | 608.86734                 | 609.66785                    | 0.80051                        | 28.01785                             |
| S phase 1-1 | 608.86597                 | 609.66711                    | 0.80114                        | 28.03990                             |
| S phase 1-2 | 608.86624                 | 609.66726                    | 0.80102                        | 28.03570                             |
| S phase 1-3 | 608.86637                 | 609.66762                    | 0.80125                        | 28.04375                             |
| S phase 2-1 | 608.86607                 | 609.66784                    | 0.80177                        | 28.06195                             |
| S phase 2-2 | 608.86656                 | 609.66796                    | 0.80140                        | 28.04900                             |
| S phase 2-3 | 608.86678                 | 609.66774                    | 0.80096                        | 28.03360                             |

Note, charge state  $35^+$ , average  $\Delta m/z$  is  $28.03742 \pm 0.01178$ ,  $0.528 \sigma$  for H12SNP and dimethylation, and  $3.611 \sigma$  for formylation, given the theoretical mass of H12SNP and dimethylation is 28.03132, whereas formylation is 27.9949.

**Table S3.** P-values of ANOVA and t-tests for proteoforms relative abundance at different cell cycle stages

| Proteoforms | MDA-MB231              |                        | MCF10A                 |                        |
|-------------|------------------------|------------------------|------------------------|------------------------|
|             | ANOVA-test             | t-test                 | ANOVA-test             | t-test                 |
| H12ac       | $4.95 \times 10^{-8}$  | $3.72 \times 10^{-4}$  | $8.15 \times 10^{-11}$ | $1.78 \times 10^{-10}$ |
| H12acph     | $3.71 \times 10^{-6}$  | $7.64 \times 10^{-5}$  | $4.64 \times 10^{-10}$ | <b>0.13</b>            |
| H12SNPac    | N/A                    | N/A                    | $3.70 \times 10^{-8}$  | $6.64 \times 10^{-6}$  |
| H12SNPacph  | N/A                    | N/A                    | $1.15 \times 10^{-8}$  | <b>0.05</b>            |
| H12SNPacph2 | N/A                    | N/A                    | $6.28 \times 10^{-15}$ | $3.48 \times 10^{-10}$ |
| H13ac       | N/A                    | N/A                    | $8.30 \times 10^{-10}$ | <b>0.18</b>            |
| H13acph     | N/A                    | N/A                    | <b>0.01</b>            | <b>0.25</b>            |
| H14ph       | $8.9 \times 10^{-6}$   | $4.97 \times 10^{-5}$  | $2.03 \times 10^{-7}$  | $2.71 \times 10^{-6}$  |
| H14ac       | $5.92 \times 10^{-11}$ | $3.04 \times 10^{-8}$  | $1.57 \times 10^{-13}$ | $1.22 \times 10^{-10}$ |
| H14acph     | $1.3 \times 10^{-5}$   | $1.15 \times 10^{-3}$  | <b>0.32</b>            | <b>0.47</b>            |
| H14acph2    | $6.8 \times 10^{-6}$   | $5.92 \times 10^{-5}$  | $1.23 \times 10^{-7}$  | $4.52 \times 10^{-6}$  |
| H14acph3    | $1.5 \times 10^{-9}$   | $9.39 \times 10^{-7}$  | $8.96 \times 10^{-7}$  | $8.86 \times 10^{-6}$  |
| H14acph4    | $1.33 \times 10^{-13}$ | $2.65 \times 10^{-9}$  | $2.92 \times 10^{-4}$  | $3.29 \times 10^{-3}$  |
| H14acph5    | $1.02 \times 10^{-14}$ | $4.81 \times 10^{-10}$ | $1.48 \times 10^{-12}$ | $1.31 \times 10^{-8}$  |

**Table S4.** P-values of ANOVA and t-tests for histone variants total phosphorylations at different cell cycle stages

| Proteoforms | MDA-MB231              |                       | MCF10A                 |                        |
|-------------|------------------------|-----------------------|------------------------|------------------------|
|             | ANOVA-test             | t-test                | ANOVA-test             | t-test                 |
| H12         | $2.31 \times 10^{-6}$  | $7.79 \times 10^{-6}$ | $2.26 \times 10^{-15}$ | $1.41 \times 10^{-12}$ |
| H13         | N/A                    | N/A                   | <b>0.02</b>            | <b>0.17</b>            |
| H14         | $7.07 \times 10^{-11}$ | $2.12 \times 10^{-8}$ | $1.49 \times 10^{-13}$ | $5.23 \times 10^{-11}$ |

**Table S5.** P-values of ANOVA and t-tests for total phosphorylations on different sites at different cell cycle stages

| Proteoforms | MDA-MB231              |                        | MCF10A                 |                        |
|-------------|------------------------|------------------------|------------------------|------------------------|
|             | ANOVA-test             | t-test                 | ANOVA-test             | t-test                 |
| H12S173     | $2.31 \times 10^{-6}$  | $7.79 \times 10^{-6}$  | $2.26 \times 10^{-15}$ | $1.41 \times 10^{-12}$ |
| H14S2       | $1.25 \times 10^{-6}$  | $6.13 \times 10^{-5}$  | $1.94 \times 10^{-6}$  | $2.80 \times 10^{-6}$  |
| H14S172     | $9.10 \times 10^{-11}$ | $2.45 \times 10^{-8}$  | $1.62 \times 10^{-14}$ | $3.72 \times 10^{-11}$ |
| H14S187     | $7.74 \times 10^{-12}$ | $1.03 \times 10^{-8}$  | $7.20 \times 10^{-11}$ | $6.99 \times 10^{-9}$  |
| H14T18      | $1.08 \times 10^{-15}$ | $5.94 \times 10^{-11}$ | $9.01 \times 10^{-6}$  | $7.64 \times 10^{-5}$  |
| H14T146     | $6.48 \times 10^{-14}$ | $1.64 \times 10^{-9}$  | $5.35 \times 10^{-5}$  | $1.13 \times 10^{-3}$  |
| H14T153     | $8.51 \times 10^{-15}$ | $4.26 \times 10^{-10}$ | $2.67 \times 10^{-12}$ | $1.93 \times 10^{-8}$  |

**Table S6.** P-values of t-tests for proteoform relative abundance between two cell lines

| <b>Proteoforms</b> | <b>Asynchronous</b>    | <b>S phase</b>         | <b>M phase</b>         |
|--------------------|------------------------|------------------------|------------------------|
| H12ac              | $8.01 \times 10^{-11}$ | $5.14 \times 10^{-10}$ | $2.42 \times 10^{-9}$  |
| H12acph            | <b>0.71</b>            | $2.58 \times 10^{-6}$  | $5.87 \times 10^{-7}$  |
| H12SNPac           | $5.06 \times 10^{-12}$ | $5.66 \times 10^{-12}$ | $3.49 \times 10^{-7}$  |
| H12SNPacph         | $1.05 \times 10^{-9}$  | $1.80 \times 10^{-9}$  | $1.48 \times 10^{-5}$  |
| H12SNPacph2        | N/A                    | N/A                    | $3.48 \times 10^{-10}$ |
| H13ac              | $3.24 \times 10^{-11}$ | $5.18 \times 10^{-11}$ | $6.55 \times 10^{-9}$  |
| H13acph            | $6.48 \times 10^{-6}$  | $4.75 \times 10^{-9}$  | $1.96 \times 10^{-11}$ |
| H14ph              | 0.04                   | $3.23 \times 10^{-6}$  | <b>0.67</b>            |
| H14ac              | $5.02 \times 10^{-10}$ | $1.31 \times 10^{-6}$  | $3.39 \times 10^{-7}$  |
| H14acph            | <b>0.08</b>            | 0.01                   | $1.14 \times 10^{-4}$  |
| H14acph2           | $6.07 \times 10^{-9}$  | $9.62 \times 10^{-7}$  | $2.84 \times 10^{-5}$  |
| H14acph3           | $4.69 \times 10^{-6}$  | $1.58 \times 10^{-6}$  | <b>0.05</b>            |
| H14acph4           | N/A                    | N/A                    | <b>0.77</b>            |
| H14acph5           | N/A                    | N/A                    | $5.99 \times 10^{-5}$  |

**Table S7.** P-values for histone variants total phosphorylations between two cell lines

| <b>Histone Variants</b> | <b>Asynchronous</b>    | <b>S phase</b>        | <b>M phase</b>        |
|-------------------------|------------------------|-----------------------|-----------------------|
| H12                     | $5.70 \times 10^{-9}$  | $8.35 \times 10^{-8}$ | $7.89 \times 10^{-9}$ |
| H13                     | $1.59 \times 10^{-6}$  | $4.70 \times 10^{-9}$ | $1.61 \times 10^{-9}$ |
| H14                     | $5.43 \times 10^{-10}$ | $5.99 \times 10^{-8}$ | $3.40 \times 10^{-7}$ |

**Table S8.** P-values for total phosphorylations on different sites between two cell lines

| <b>Proteoforms</b> | <b>Asynchronous</b>    | <b>S phase</b>        | <b>M phase</b>        |
|--------------------|------------------------|-----------------------|-----------------------|
| H12S173            | $5.7 \times 10^{-9}$   | $8.35 \times 10^{-8}$ | $7.89 \times 10^{-9}$ |
| H14S2              | <b>0.19</b>            | $6.89 \times 10^{-6}$ | <b>0.51</b>           |
| H14S172            | $1.15 \times 10^{-10}$ | $8.79 \times 10^{-8}$ | $6.58 \times 10^{-7}$ |
| H14S187            | $1.26 \times 10^{-8}$  | $3.89 \times 10^{-7}$ | $1.21 \times 10^{-4}$ |
| H14T18             | $1.22 \times 10^{-5}$  | $1.40 \times 10^{-6}$ | <b>0.49</b>           |
| H14T146            | N/A                    | N/A                   | <b>0.29</b>           |
| H14T154            | N/A                    | N/A                   | $3.94 \times 10^{-5}$ |

## Legends for Supporting Information Figures

**Figure S1.** Broadband ESI positive ion 9.4 T FT-ICR mass spectra of histone H1 from asynchronous, s phase, and m phase cells from cell lines MDA-MB-231 and MCF-10A.

**Figure S2.** ECD fragmentation maps for different histone proteoforms from cell line MDA-MB-231.

**Figure S3.** ECD fragmentation maps for different proteoforms from cell line MCF-10A.

**Figure S4.** Mass scale-expanded segment of ECD product ion mass spectra of histone H1.2 SNP A18V from asynchronous cells from cell line MCF-10A, showing identification of  $C_{16}^{2+}$ ,  $C_{18}^{2+}$ ,  $C_{19}^{2+}$ ,  $C_{20}^{2+}$ ,  $C_{21}^{2+}$ ,  $C_{21}^{3+}$ ,  $C_{22}^{2+}$ , and  $C_{22}^{3+}$  ions.

**Figure S5.** Peak annotations for the ECD product ion mass spectrum of asynchronous histone H1.2 SNP A18V from cell line MCF-10A. .

**Figure S6.** Peak annotations for the ECD product ion mass spectrum of S phase histone H1.2 SNP A18V from cell line MCF-10A. .

**Figure S7.** Peak annotations for the ECD product ion mass spectrum of asynchronous phosphorylated histone H1.2 SNP A18V from cell line MCF-10A.

MDA-MB-231

MCF-10A

Figure S1

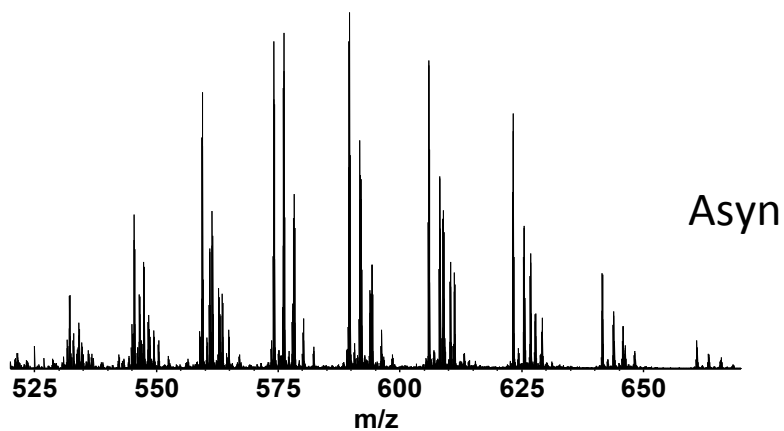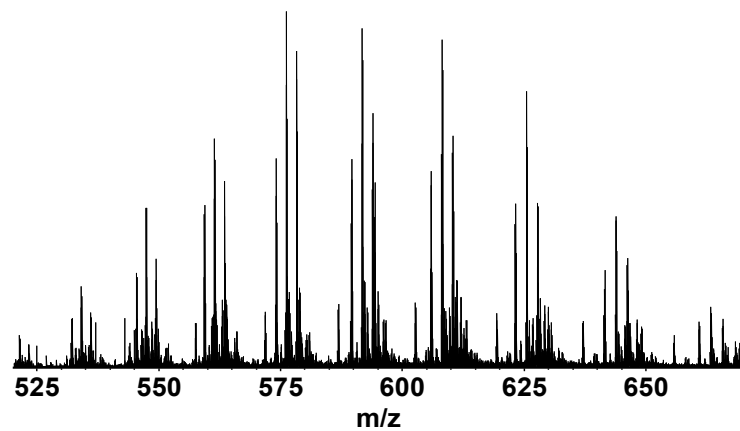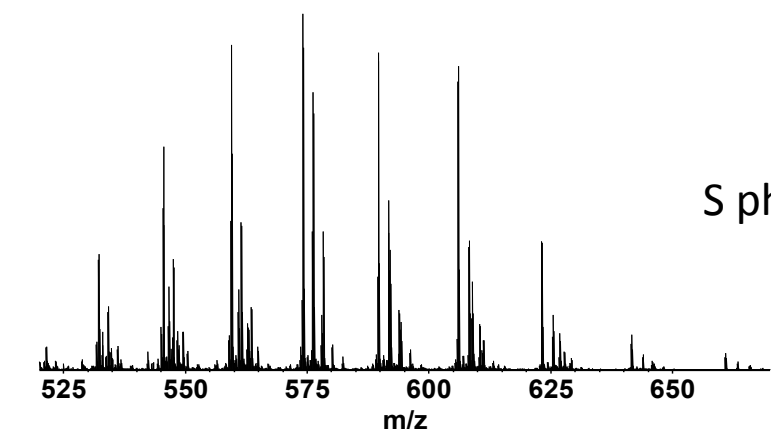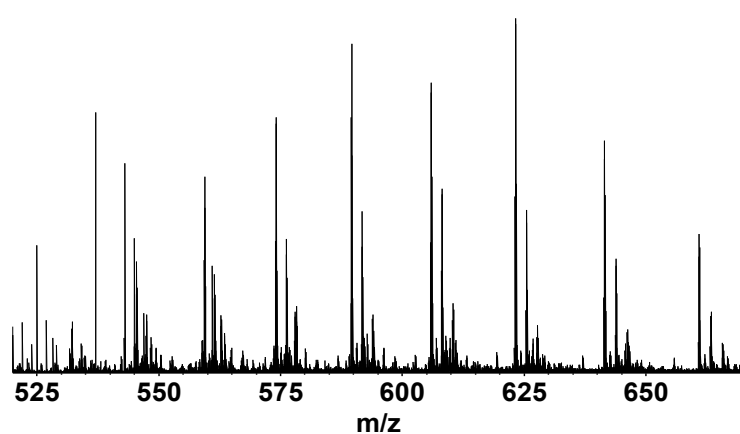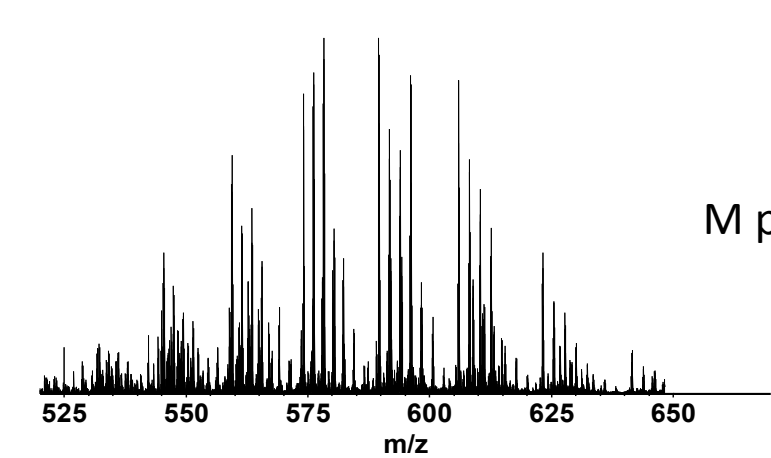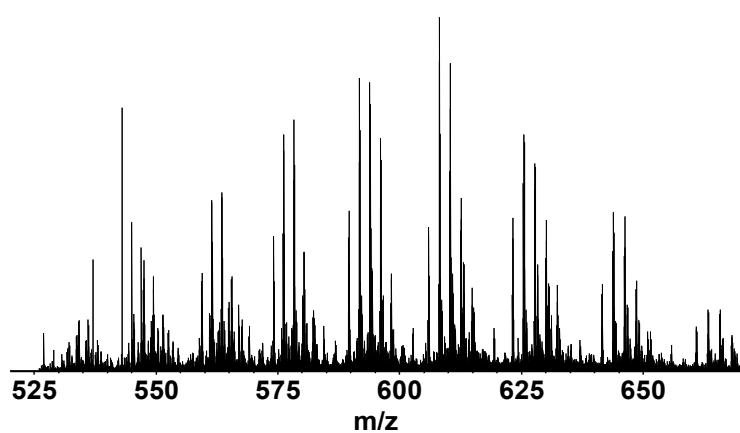



### H12ac\_asyn

ac-S E T<sup>ph</sup> A P A A P A<sup>ph</sup> A A P P A E K<sup>ph</sup> A P V K<sup>ph</sup> K<sup>ph</sup> A<sup>ph</sup> A<sup>ph</sup> K<sup>ph</sup> K<sup>ph</sup>  
 A G<sup>ph</sup> G<sup>ph</sup> T P R<sup>ph</sup> K<sup>ph</sup> A S<sup>ph</sup> G P P V<sup>ph</sup> S<sup>ph</sup> E<sup>ph</sup> L I T K<sup>ph</sup> A<sup>ph</sup> V<sup>ph</sup> A<sup>ph</sup> A<sup>ph</sup> S<sup>ph</sup> K<sup>ph</sup> E<sup>ph</sup>  
 R<sup>ph</sup> S<sup>ph</sup> G V S L<sup>ph</sup> A<sup>ph</sup> A<sup>ph</sup> L K<sup>ph</sup> K<sup>ph</sup> A<sup>ph</sup> L A A A G Y<sup>ph</sup> D V<sup>ph</sup> E<sup>ph</sup> K<sup>ph</sup> N<sup>ph</sup> N<sup>ph</sup> S<sup>ph</sup> R  
 I K<sup>ph</sup> L G<sup>ph</sup> L K S L V S K G T L V Q<sup>ph</sup> T K G T G A S G S F  
 K L N K K A A S G<sup>ph</sup> E A<sup>ph</sup> K P K V K K A G G T<sup>ph</sup> K P K<sup>ph</sup> K<sup>ph</sup> P  
 V G A A K<sup>ph</sup> K<sup>ph</sup> P K<sup>ph</sup> K<sup>ph</sup> A A G G A T P K K S<sup>ph</sup> A K K<sup>ph</sup> T P K<sup>ph</sup> K<sup>ph</sup>  
 A K K P A A A T<sup>ph</sup> V<sup>ph</sup> T<sup>ph</sup> K<sup>ph</sup> K<sup>ph</sup> V A K<sup>ph</sup> S P K<sup>ph</sup> K<sup>ph</sup> A<sup>ph</sup> K<sup>ph</sup> V A<sup>ph</sup> K<sup>ph</sup> P<sup>ph</sup> K<sup>ph</sup> L  
 K<sup>ph</sup> A<sup>ph</sup> A<sup>ph</sup> K<sup>ph</sup> S<sup>ph</sup> A<sup>ph</sup> A<sup>ph</sup> K<sup>ph</sup> A V<sup>ph</sup> K<sup>ph</sup> P K A A<sup>ph</sup> K<sup>ph</sup> P<sup>ph</sup> K<sup>ph</sup> V V<sup>ph</sup> K<sup>ph</sup> P<sup>ph</sup> K<sup>ph</sup> K<sup>ph</sup> A<sup>ph</sup> A<sup>ph</sup>  
 P<sup>ph</sup> K<sup>ph</sup> K<sup>ph</sup> K<sup>ph</sup>

### H12acph asyn

ac-S E T<sup>ph</sup> A P A A P A<sup>ph</sup> A A P P A E K<sup>ph</sup> A P V<sup>ph</sup> K<sup>ph</sup> K<sup>ph</sup> A<sup>ph</sup> A<sup>ph</sup> K<sup>ph</sup> K<sup>ph</sup>  
 A<sup>ph</sup> G<sup>ph</sup> G<sup>ph</sup> T P R<sup>ph</sup> K<sup>ph</sup> A S<sup>ph</sup> G P P V<sup>ph</sup> S<sup>ph</sup> E<sup>ph</sup> L I T K<sup>ph</sup> A<sup>ph</sup> V<sup>ph</sup> A<sup>ph</sup> A<sup>ph</sup> S<sup>ph</sup> K<sup>ph</sup> E<sup>ph</sup>  
 R<sup>ph</sup> S<sup>ph</sup> G V<sup>ph</sup> S<sup>ph</sup> L<sup>ph</sup> A<sup>ph</sup> A<sup>ph</sup> L K<sup>ph</sup> K<sup>ph</sup> A<sup>ph</sup> L A A A G Y<sup>ph</sup> D V<sup>ph</sup> E<sup>ph</sup> K<sup>ph</sup> N<sup>ph</sup> N<sup>ph</sup> S<sup>ph</sup> R  
 I K<sup>ph</sup> L G<sup>ph</sup> L K S<sup>ph</sup> L V S K G T L V Q<sup>ph</sup> T K G T G A S G S F  
 K L N K K A A S G<sup>ph</sup> E A<sup>ph</sup> K P K V K K A G G T<sup>ph</sup> K P K<sup>ph</sup> K<sup>ph</sup> P  
 V G<sup>ph</sup> A A K K P K<sup>ph</sup> K<sup>ph</sup> A A G G A T P K<sup>ph</sup> K<sup>ph</sup> S<sup>ph</sup> A K K T P K<sup>ph</sup> K<sup>ph</sup> L  
 A K<sup>ph</sup> K P A A A T<sup>ph</sup> V<sup>ph</sup> T<sup>ph</sup> K<sup>ph</sup> K<sup>ph</sup> V A<sup>ph</sup> K<sup>ph</sup> S<sup>ph</sup> P K<sup>ph</sup> K<sup>ph</sup> A<sup>ph</sup> K<sup>ph</sup> V A<sup>ph</sup> K<sup>ph</sup> P<sup>ph</sup> K<sup>ph</sup> L  
 K<sup>ph</sup> A<sup>ph</sup> A<sup>ph</sup> K<sup>ph</sup> S<sup>ph</sup> A<sup>ph</sup> A<sup>ph</sup> K<sup>ph</sup> A V<sup>ph</sup> K<sup>ph</sup> P K A A<sup>ph</sup> K<sup>ph</sup> P<sup>ph</sup> K<sup>ph</sup> V V<sup>ph</sup> K<sup>ph</sup> P<sup>ph</sup> K<sup>ph</sup> K<sup>ph</sup> A<sup>ph</sup> A<sup>ph</sup>  
 P<sup>ph</sup> K<sup>ph</sup> K<sup>ph</sup> K<sup>ph</sup>

### H120acT146ph asyn

ac-S E T<sup>ph</sup> A P A A P A<sup>ph</sup> A A P P A E K<sup>ph</sup> A P V<sup>ph</sup> K<sup>ph</sup> K<sup>ph</sup> A<sup>ph</sup> A<sup>ph</sup> K<sup>ph</sup> K<sup>ph</sup>  
 A<sup>ph</sup> G<sup>ph</sup> G<sup>ph</sup> T P R<sup>ph</sup> K<sup>ph</sup> A S<sup>ph</sup> G P P V<sup>ph</sup> S<sup>ph</sup> E<sup>ph</sup> L I T K<sup>ph</sup> A<sup>ph</sup> V<sup>ph</sup> A<sup>ph</sup> A<sup>ph</sup> S<sup>ph</sup> K<sup>ph</sup> E<sup>ph</sup>  
 R<sup>ph</sup> S<sup>ph</sup> G V<sup>ph</sup> S<sup>ph</sup> L<sup>ph</sup> A<sup>ph</sup> A<sup>ph</sup> L K<sup>ph</sup> K<sup>ph</sup> A<sup>ph</sup> L A A A G Y<sup>ph</sup> D V<sup>ph</sup> E<sup>ph</sup> K<sup>ph</sup> N<sup>ph</sup> N<sup>ph</sup> S<sup>ph</sup> R  
 I K<sup>ph</sup> L G<sup>ph</sup> L K S<sup>ph</sup> L V S K G T L V Q<sup>ph</sup> T K G T G A S G S F  
 K L N K K A A S G<sup>ph</sup> E A<sup>ph</sup> K P K V K K A G G T<sup>ph</sup> K P K<sup>ph</sup> K<sup>ph</sup> P  
 V G<sup>ph</sup> A A K K P K<sup>ph</sup> K<sup>ph</sup> A A G G A T<sup>ph</sup> P K K S A K K T P K<sup>ph</sup> K<sup>ph</sup>  
 A K K P A A A T<sup>ph</sup> V<sup>ph</sup> T<sup>ph</sup> K K V A K S P K<sup>ph</sup> K<sup>ph</sup> A<sup>ph</sup> K<sup>ph</sup> V A<sup>ph</sup> K<sup>ph</sup> P<sup>ph</sup> K<sup>ph</sup> L  
 K<sup>ph</sup> A<sup>ph</sup> A<sup>ph</sup> K<sup>ph</sup> S<sup>ph</sup> A<sup>ph</sup> A<sup>ph</sup> K<sup>ph</sup> A V<sup>ph</sup> K<sup>ph</sup> P K A A<sup>ph</sup> K<sup>ph</sup> P<sup>ph</sup> K<sup>ph</sup> V V<sup>ph</sup> K<sup>ph</sup> P<sup>ph</sup> K<sup>ph</sup> K<sup>ph</sup> A<sup>ph</sup> A<sup>ph</sup>  
 P<sup>ph</sup> K<sup>ph</sup> K<sup>ph</sup> K<sup>ph</sup>

### H14ph\_asyn

<sup>ph</sup> S E T A P A A P A<sup>ph</sup> A P A P A E K<sup>ph</sup> T P V K K K A R K S  
 A G A<sup>ph</sup> A K R K A S G P P V S<sup>ph</sup> E L I T K A V A A S<sup>ph</sup> K E<sup>ph</sup>  
 R S G V S L<sup>ph</sup> A A L K K A L A A A G Y<sup>ph</sup> D V E K N N S R  
 I K L G L K S L V S K G T L V Q T K G T G A S G S F  
 K L N K K A A S G<sup>ph</sup> E A<sup>ph</sup> K P K A K K A G A A K A K K P  
 A G A A K<sup>ph</sup> K<sup>ph</sup> P K<sup>ph</sup> K<sup>ph</sup> A T<sup>ph</sup> G A A T P K K S<sup>ph</sup> A K K T P K<sup>ph</sup> K<sup>ph</sup>  
 A K K P A A A A<sup>ph</sup> G<sup>ph</sup> A<sup>ph</sup> K<sup>ph</sup> K A K<sup>ph</sup> S P<sup>ph</sup> K<sup>ph</sup> K<sup>ph</sup> A<sup>ph</sup> K<sup>ph</sup> A<sup>ph</sup> K<sup>ph</sup> P K<sup>ph</sup> K<sup>ph</sup>  
 A P K S P<sup>ph</sup> A<sup>ph</sup> K<sup>ph</sup> A<sup>ph</sup> K<sup>ph</sup> A V<sup>ph</sup> K<sup>ph</sup> P<sup>ph</sup> K<sup>ph</sup> A<sup>ph</sup> A<sup>ph</sup> K<sup>ph</sup> P K T A<sup>ph</sup> K<sup>ph</sup> P<sup>ph</sup> K<sup>ph</sup> A A<sup>ph</sup> L  
 K P<sup>ph</sup> K<sup>ph</sup> K<sup>ph</sup> A<sup>ph</sup> A<sup>ph</sup> K K K

### H14ac\_asyn

ac-S E T A P<sup>ph</sup> A A P A A P A P A E K<sup>ph</sup> T P V K<sup>ph</sup> K<sup>ph</sup> A<sup>ph</sup> R<sup>ph</sup> K S  
 A<sup>ph</sup> G<sup>ph</sup> A A K R<sup>ph</sup> K<sup>ph</sup> A S<sup>ph</sup> G P P V<sup>ph</sup> S<sup>ph</sup> E<sup>ph</sup> L I T K<sup>ph</sup> A<sup>ph</sup> V<sup>ph</sup> A<sup>ph</sup> A<sup>ph</sup> S<sup>ph</sup> K<sup>ph</sup> E<sup>ph</sup>  
 R<sup>ph</sup> S<sup>ph</sup> G<sup>ph</sup> V<sup>ph</sup> S<sup>ph</sup> L<sup>ph</sup> A<sup>ph</sup> A<sup>ph</sup> L K<sup>ph</sup> K<sup>ph</sup> A<sup>ph</sup> L A A A G Y<sup>ph</sup> D V<sup>ph</sup> E<sup>ph</sup> K<sup>ph</sup> N<sup>ph</sup> N<sup>ph</sup> S<sup>ph</sup> R  
 I K<sup>ph</sup> L<sup>ph</sup> G<sup>ph</sup> L K<sup>ph</sup> S<sup>ph</sup> L<sup>ph</sup> V<sup>ph</sup> S<sup>ph</sup> K<sup>ph</sup> G<sup>ph</sup> T<sup>ph</sup> L V<sup>ph</sup> Q<sup>ph</sup> T<sup>ph</sup> K G T G<sup>ph</sup> A S G<sup>ph</sup> S<sup>ph</sup> F<sup>ph</sup>  
 K L N<sup>ph</sup> K K A A S G<sup>ph</sup> E A<sup>ph</sup> K P<sup>ph</sup> K<sup>ph</sup> A K K A<sup>ph</sup> G<sup>ph</sup> A<sup>ph</sup> K<sup>ph</sup> A<sup>ph</sup> K<sup>ph</sup> P  
 A G A<sup>ph</sup> A<sup>ph</sup> K<sup>ph</sup> K<sup>ph</sup> P K<sup>ph</sup> K<sup>ph</sup> A T<sup>ph</sup> G A A T P K<sup>ph</sup> K<sup>ph</sup> S<sup>ph</sup> A<sup>ph</sup> K<sup>ph</sup> K T P K<sup>ph</sup> K<sup>ph</sup> L  
 A K<sup>ph</sup> K P A A A A<sup>ph</sup> G<sup>ph</sup> A<sup>ph</sup> K<sup>ph</sup> K A<sup>ph</sup> K<sup>ph</sup> S P<sup>ph</sup> K<sup>ph</sup> K<sup>ph</sup> A<sup>ph</sup> K<sup>ph</sup> A<sup>ph</sup> K<sup>ph</sup> P K<sup>ph</sup> K<sup>ph</sup>  
 A P K S P<sup>ph</sup> A<sup>ph</sup> K<sup>ph</sup> A<sup>ph</sup> K<sup>ph</sup> A V<sup>ph</sup> K<sup>ph</sup> P K A A<sup>ph</sup> K<sup>ph</sup> P K T A<sup>ph</sup> K<sup>ph</sup> P<sup>ph</sup> K<sup>ph</sup> A A<sup>ph</sup> L  
 K P<sup>ph</sup> K<sup>ph</sup> K<sup>ph</sup> A<sup>ph</sup> A<sup>ph</sup> K K K

### H14acph\_asyn

ac-S E<sup>ph</sup> T<sup>ph</sup> A P A A P A A P A P A E K<sup>ph</sup> T P V K K K A<sup>ph</sup> R<sup>ph</sup> K S  
 A G A<sup>ph</sup> A K R<sup>ph</sup> K<sup>ph</sup> A S G P P V S<sup>ph</sup> E L I T K A V A<sup>ph</sup> A<sup>ph</sup> S<sup>ph</sup> K E<sup>ph</sup>  
 R S G<sup>ph</sup> V S<sup>ph</sup> L<sup>ph</sup> A<sup>ph</sup> A<sup>ph</sup> L K<sup>ph</sup> K<sup>ph</sup> A<sup>ph</sup> L A A A G Y<sup>ph</sup> D V E<sup>ph</sup> K<sup>ph</sup> N<sup>ph</sup> N<sup>ph</sup> S<sup>ph</sup> R  
 I K<sup>ph</sup> L<sup>ph</sup> G<sup>ph</sup> L K S<sup>ph</sup> L<sup>ph</sup> V S K G T L V Q<sup>ph</sup> T<sup>ph</sup> K G T G A S G<sup>ph</sup> S<sup>ph</sup> F<sup>ph</sup>  
 K L N<sup>ph</sup> K K A A S G<sup>ph</sup> E A<sup>ph</sup> K P<sup>ph</sup> K<sup>ph</sup> A K K A<sup>ph</sup> G<sup>ph</sup> A<sup>ph</sup> K<sup>ph</sup> A<sup>ph</sup> K<sup>ph</sup> P  
 A G<sup>ph</sup> A<sup>ph</sup> A<sup>ph</sup> K<sup>ph</sup> K<sup>ph</sup> P K<sup>ph</sup> K<sup>ph</sup> A T<sup>ph</sup> G A A T P K<sup>ph</sup> K<sup>ph</sup> S<sup>ph</sup> A<sup>ph</sup> K<sup>ph</sup> K T P K<sup>ph</sup> K<sup>ph</sup> L  
 A K<sup>ph</sup> K P<sup>ph</sup> A<sup>ph</sup> A<sup>ph</sup> G<sup>ph</sup> A<sup>ph</sup> K<sup>ph</sup> K A<sup>ph</sup> K<sup>ph</sup> S P<sup>ph</sup> K<sup>ph</sup> K<sup>ph</sup> A<sup>ph</sup> K<sup>ph</sup> A<sup>ph</sup> K<sup>ph</sup> P K<sup>ph</sup> K<sup>ph</sup>  
 A P K S P<sup>ph</sup> A<sup>ph</sup> K<sup>ph</sup> A<sup>ph</sup> K<sup>ph</sup> A V<sup>ph</sup> K<sup>ph</sup> P K A A<sup>ph</sup> K<sup>ph</sup> P K T A<sup>ph</sup> K<sup>ph</sup> P<sup>ph</sup> K<sup>ph</sup> A A<sup>ph</sup> L  
 K P<sup>ph</sup> K<sup>ph</sup> K<sup>ph</sup> A<sup>ph</sup> A<sup>ph</sup> K K K

H14acphx2\_asyn

ac-S E T<sup>1</sup>A P A A P A<sup>1</sup>A P A P A E K<sup>1</sup>T P V K<sup>1</sup>K<sup>1</sup>A R<sup>1</sup>K<sup>1</sup>S  
 A<sup>1</sup>G<sup>1</sup>A<sup>1</sup>A<sup>1</sup>K<sup>1</sup>R<sup>1</sup>K<sup>1</sup>A<sup>1</sup>S<sup>1</sup>G P P V<sup>1</sup>S<sup>1</sup>E<sup>1</sup>L I T<sup>1</sup>K<sup>1</sup>A V<sup>1</sup>A<sup>1</sup>A<sup>1</sup>S<sup>1</sup>K<sup>1</sup>E<sup>1</sup>  
 R<sup>1</sup>S<sup>1</sup>G V<sup>1</sup>S<sup>1</sup>L<sup>1</sup>A<sup>1</sup>A<sup>1</sup>L<sup>1</sup>K<sup>1</sup>K<sup>1</sup>A<sup>1</sup>L<sup>1</sup>A A A G Y<sup>1</sup>D V<sup>1</sup>E<sup>1</sup>K<sup>1</sup>N<sup>1</sup>N<sup>1</sup>S R  
 I K<sup>1</sup>L<sup>1</sup>G<sup>1</sup>L K S<sup>1</sup>L<sup>1</sup>V<sup>1</sup>S<sup>1</sup>K G T L V<sup>1</sup>Q<sup>1</sup>T<sup>1</sup>K G T<sup>1</sup>G A S G<sup>1</sup>S F<sup>1</sup>  
 K L N K K A A S G<sup>1</sup>E A<sup>1</sup>K P<sup>1</sup>K<sup>1</sup>A K K A G<sup>1</sup>A A<sup>1</sup>K A K<sup>1</sup>K P  
 A G A A K K P K<sup>1</sup>K<sup>1</sup>A T G A A T P K K<sup>1</sup>S A K K T P K<sup>1</sup>K<sup>1</sup>  
 A K K P A A A<sup>1</sup>A<sup>1</sup>G<sup>1</sup>A<sup>1</sup>K<sup>1</sup>K<sup>1</sup>A K<sup>1</sup>S<sup>ph</sup> P<sup>1</sup>K<sup>1</sup>K<sup>1</sup>A<sup>1</sup>K A A<sup>1</sup>K P K K  
 A P K<sup>1</sup>S<sup>ph</sup> P<sup>1</sup>A<sup>1</sup>K<sup>1</sup>A<sup>1</sup>K A V<sup>1</sup>K P<sup>1</sup>K A A<sup>1</sup>K P K T A<sup>1</sup>K P<sup>1</sup>K A A<sup>1</sup>  
 K P<sup>1</sup>K<sup>1</sup>K A<sup>1</sup>A<sup>1</sup>K K K

H12ac\_s phase

ac-S E T<sup>1</sup>A P A A P A<sup>1</sup>A A P P A E K<sup>1</sup>A P V<sup>1</sup>K<sup>1</sup>K<sup>1</sup>A<sup>1</sup>A<sup>1</sup>K<sup>1</sup>  
 A<sup>1</sup>G<sup>1</sup>T P<sup>1</sup>R<sup>1</sup>K<sup>1</sup>A<sup>1</sup>S<sup>1</sup>G P P V<sup>1</sup>S<sup>1</sup>E<sup>1</sup>L I T<sup>1</sup>K<sup>1</sup>A V<sup>1</sup>A<sup>1</sup>A<sup>1</sup>S<sup>1</sup>K<sup>1</sup>E<sup>1</sup>  
 R<sup>1</sup>S<sup>1</sup>G V<sup>1</sup>S<sup>1</sup>L<sup>1</sup>A<sup>1</sup>A<sup>1</sup>L<sup>1</sup>K<sup>1</sup>K<sup>1</sup>A<sup>1</sup>L A A A G Y<sup>1</sup>D V<sup>1</sup>E<sup>1</sup>K<sup>1</sup>N<sup>1</sup>N<sup>1</sup>S R  
 I K<sup>1</sup>L G<sup>1</sup>L K S<sup>1</sup>L V S K G T L V<sup>1</sup>Q<sup>1</sup>T<sup>1</sup>K G T<sup>1</sup>G A S G<sup>1</sup>S F  
 K L N K K A A S G<sup>1</sup>E A<sup>1</sup>K P K V K K A G G T<sup>1</sup>K P K<sup>1</sup>K P  
 V G A<sup>1</sup>A K<sup>1</sup>K P K<sup>1</sup>K<sup>1</sup>A A G G A<sup>1</sup>T P K K<sup>1</sup>S<sup>1</sup>A K K T P K<sup>1</sup>K  
 A K<sup>1</sup>K P A A A T<sup>1</sup>V<sup>1</sup>T<sup>1</sup>K<sup>1</sup>K V A K<sup>1</sup>S P K<sup>1</sup>K<sup>1</sup>A K V A<sup>1</sup>K P<sup>1</sup>K<sup>1</sup>  
 K<sup>1</sup>A<sup>1</sup>A K<sup>1</sup>S<sup>1</sup>A<sup>1</sup>A<sup>1</sup>K A V<sup>1</sup>K P K A A<sup>1</sup>K P<sup>1</sup>K V V<sup>1</sup>K P<sup>1</sup>K<sup>1</sup>K A<sup>1</sup>A  
 P<sup>1</sup>K K K

H12acph\_s phase

ac-S E T A P A A P A A A P P A E K<sup>1</sup>A P V<sup>1</sup>K<sup>1</sup>K<sup>1</sup>A<sup>1</sup>A<sup>1</sup>K<sup>1</sup>  
 A<sup>1</sup>G<sup>1</sup>T P R<sup>1</sup>K A S<sup>1</sup>G P P V<sup>1</sup>S<sup>1</sup>E<sup>1</sup>L I T<sup>1</sup>K A V<sup>1</sup>A A<sup>1</sup>S<sup>1</sup>K E<sup>1</sup>  
 R<sup>1</sup>S<sup>1</sup>G V<sup>1</sup>S L<sup>1</sup>A<sup>1</sup>A<sup>1</sup>L K<sup>1</sup>K<sup>1</sup>A L A A A G Y<sup>1</sup>D V<sup>1</sup>E<sup>1</sup>K<sup>1</sup>N<sup>1</sup>N<sup>1</sup>S R  
 I K<sup>1</sup>L G L K S L V S K G T L V<sup>1</sup>Q T K G T G A S G S F  
 K L N K K A A S G<sup>1</sup>E A<sup>1</sup>K P K V K K A G G T<sup>1</sup>K P K<sup>1</sup>K P  
 V G A A K K P K<sup>1</sup>K<sup>1</sup>A A G G A T P K K<sup>1</sup>S<sup>1</sup>A K K T P K<sup>1</sup>K  
 A K<sup>1</sup>K P A A A T<sup>1</sup>V<sup>1</sup>T<sup>1</sup>K<sup>1</sup>K V A K<sup>1</sup>S<sup>ph</sup> P K<sup>1</sup>K<sup>1</sup>A<sup>1</sup>K V A<sup>1</sup>K P<sup>1</sup>K<sup>1</sup>  
 K<sup>1</sup>A<sup>1</sup>A K<sup>1</sup>S<sup>1</sup>A<sup>1</sup>A<sup>1</sup>K A V<sup>1</sup>K P K A A<sup>1</sup>K P<sup>1</sup>K V V<sup>1</sup>K P<sup>1</sup>K<sup>1</sup>K A<sup>1</sup>A  
 P<sup>1</sup>K K K

H12acT146ph\_s phase

ac-S E T A P A A P A A A P P A E K<sup>1</sup>A P V<sup>1</sup>K<sup>1</sup>K<sup>1</sup>A<sup>1</sup>A<sup>1</sup>K<sup>1</sup>  
 A<sup>1</sup>G<sup>1</sup>T P R<sup>1</sup>K A S<sup>1</sup>G P P V<sup>1</sup>S<sup>1</sup>E<sup>1</sup>L I T<sup>1</sup>K A V<sup>1</sup>A A<sup>1</sup>S<sup>1</sup>K E<sup>1</sup>  
 R<sup>1</sup>S<sup>1</sup>G V<sup>1</sup>S L<sup>1</sup>A<sup>1</sup>A<sup>1</sup>L K<sup>1</sup>K<sup>1</sup>A L A A A G Y<sup>1</sup>D V<sup>1</sup>E<sup>1</sup>K<sup>1</sup>N<sup>1</sup>N<sup>1</sup>S R  
 I K<sup>1</sup>L G L K S L V S K G T L V<sup>1</sup>Q T K G T G A S G S F  
 K L N K K A A S G<sup>1</sup>E A<sup>1</sup>K P K V K K A G G T<sup>1</sup>K P K<sup>1</sup>K P  
 V G A A K K P K<sup>1</sup>K<sup>1</sup>A A G G A<sup>1</sup>T<sup>ph</sup> P K K S A K K T P K K  
 A K K P A A A T V T K K V A K S P K<sup>1</sup>K<sup>1</sup>A<sup>1</sup>K V A<sup>1</sup>K P<sup>1</sup>K<sup>1</sup>  
 K<sup>1</sup>A<sup>1</sup>A K<sup>1</sup>S<sup>1</sup>A<sup>1</sup>A<sup>1</sup>K A V<sup>1</sup>K P K A A<sup>1</sup>K P<sup>1</sup>K V V<sup>1</sup>K P<sup>1</sup>K<sup>1</sup>K A<sup>1</sup>A  
 P<sup>1</sup>K K K

MDA-MB-231

H14ph\_s phase

<sup>ph</sup>  
 S E T A P A A P A A P A P A E K T P V K K K A R K S  
 A G A A K R K A S G P P V S E L I T K A V A A S K E  
 R S G V S L A A L K K A L A A A G Y D V E K N N S R  
 I K L G L K S L V S K G T L V Q T K G T G A S G S F  
 K L N K K A A S G E A K P K A K K A G A A K A K K P  
 A G A A K K P K K A T G A A T P K K S A K K T P K K  
 A K K P A A A A G A K K A K S P K K A K A A K P K K  
 A P K S P A K A K A V K P K A A K P K T A K P K A A  
 K P K K A A A K K

H14ac\_s phase

<sup>ac</sup>-S E T A P A A P A A P A P A E K T P V K K K A R K S  
 A G A A K R K A S G P P V S E L I T K A V A A S K E  
 R S G V S L A A L K K A L A A A G Y D V E K N N S R  
 I K L G L K S L V S K G T L V Q T K G T G A S G S F  
 K L N K K A A S G E A K P K A K K A G A A K K P  
 A G A A K K P K K A T G A A T P K K S A K K T P K K  
 A K K P A A A A G A K K A K S P K K A K A A K P K K  
 A P K S P A K A K A V K P K A A K P K T A K P K A A  
 K P K K A A A K K

H14acph\_s phase

<sup>ac</sup>-S E T A P A A P A A P A P A E K T P V K K K A R K S  
 A G A A K R K A S G P P V S E L I T K A V A A S K E  
 R S G V S L A A L K K A L A A A G Y D V E K N N S R  
 I K L G L K S L V S K G T L V Q T K G T G A S G S F  
 K L N K K A A S G E A K P K A K K A G A A K K P  
 A G A A K K P K K A T G A A T P K K S A K K T P K K  
 A K K P A A A A G A K K A K S P K K A K A A K P K K  
 A P K S P A K A K A V K P K A A K P K T A K P K A A  
 K P K K A A A K K

H14acph2\_s phase

<sup>ac</sup>-S E T A P A A P A A P A P A E K T P V K K K A R K S  
 A G A A K R K A S G P P V S E L I T K A V A A S K E  
 R S G V S L A A L K K A L A A A G Y D V E K N N S R  
 I K L G L K S L V S K G T L V Q T K G T G A S G S F  
 K L N K K A A S G E A K P K A K K A G A A K K P  
 A G A A K K P K K A T G A A T P K K S A K K T P K K  
 A K K P A A A A G A K K A K S P K K A K A A K P K K  
 A P K S P A K A K A V K P K A A K P K T A K P K A A  
 K P K K A A A K K

H12ac\_m phase

ac-S E T<sup>1</sup>A P A A P A<sup>1</sup>A A P P<sup>1</sup>A E K<sup>1</sup>A P V<sup>1</sup>K<sup>1</sup>K<sup>1</sup>A<sup>1</sup>A<sup>1</sup>K<sup>1</sup>K<sup>1</sup>  
A<sup>1</sup>G<sup>1</sup>G<sup>1</sup>T P<sup>1</sup>R<sup>1</sup>K<sup>1</sup>A<sup>1</sup>S<sup>1</sup>G P P V<sup>1</sup>S<sup>1</sup>E<sup>1</sup>L I T<sup>1</sup>K<sup>1</sup>A<sup>1</sup>V<sup>1</sup>A<sup>1</sup>A<sup>1</sup>S<sup>1</sup>K<sup>1</sup>E<sup>1</sup>  
R<sup>1</sup>S<sup>1</sup>G V<sup>1</sup>S L<sup>1</sup>A<sup>1</sup>A<sup>1</sup>L<sup>1</sup>K<sup>1</sup>K<sup>1</sup>A<sup>1</sup>L A A A G Y<sup>1</sup>D V<sup>1</sup>E<sup>1</sup>K<sup>1</sup>N<sup>1</sup>N<sup>1</sup>S R  
I K<sup>1</sup>L G<sup>1</sup>L K S L V S K G T L V Q<sup>1</sup>T<sup>1</sup>K G T G A S G S F  
K L N K K A A S G<sup>1</sup>E A<sup>1</sup>K P K V K K A G G T<sup>1</sup>K P K<sup>1</sup>K P  
V G A A K<sup>1</sup>K P K<sup>1</sup>K<sup>1</sup>A A G G A<sup>1</sup>T P K K<sup>1</sup>S<sup>1</sup>A<sup>1</sup>K K T P K<sup>1</sup>K  
A K<sup>1</sup>K P A A A T V<sup>1</sup>T<sup>1</sup>K<sup>1</sup>K V A K<sup>1</sup>S P K<sup>1</sup>K<sup>1</sup>A K V A<sup>1</sup>K P<sup>1</sup>K<sup>1</sup>  
K<sup>1</sup>A<sup>1</sup>A K<sup>1</sup>S<sup>1</sup>A<sup>1</sup>A<sup>1</sup>K A V<sup>1</sup>K P K A A<sup>1</sup>K P<sup>1</sup>K V V<sup>1</sup>K P<sup>1</sup>K<sup>1</sup>K A<sup>1</sup>A  
P<sup>1</sup>K K K

H12acph\_m phase

ac-S E T<sup>1</sup>A P A A P A A A P P A E K<sup>1</sup>A P V<sup>1</sup>K<sup>1</sup>K<sup>1</sup>A<sup>1</sup>A<sup>1</sup>K<sup>1</sup>K<sup>1</sup>  
A<sup>1</sup>G<sup>1</sup>G<sup>1</sup>T P<sup>1</sup>R<sup>1</sup>K<sup>1</sup>A S<sup>1</sup>G P P V<sup>1</sup>S<sup>1</sup>E<sup>1</sup>L I T<sup>1</sup>K A<sup>1</sup>V<sup>1</sup>A<sup>1</sup>A<sup>1</sup>S<sup>1</sup>K<sup>1</sup>E<sup>1</sup>  
R<sup>1</sup>S<sup>1</sup>G V<sup>1</sup>S L<sup>1</sup>A<sup>1</sup>A<sup>1</sup>L<sup>1</sup>K<sup>1</sup>K<sup>1</sup>A<sup>1</sup>L A A A G Y<sup>1</sup>D V<sup>1</sup>E<sup>1</sup>K<sup>1</sup>N<sup>1</sup>N<sup>1</sup>S R  
I K<sup>1</sup>L G<sup>1</sup>L K S L V S K G T L V Q<sup>1</sup>T<sup>1</sup>K G T G A S G S F  
K L N K K A A S G<sup>1</sup>E A<sup>1</sup>K P K V K K A G G T<sup>1</sup>K P K<sup>1</sup>K P  
V G A A K<sup>1</sup>K P K<sup>1</sup>K<sup>1</sup>A A G G A<sup>1</sup>T P K K<sup>1</sup>S<sup>1</sup>A<sup>1</sup>K K T P K<sup>1</sup>K  
A K<sup>1</sup>K P A A A T V<sup>1</sup>T<sup>1</sup>K<sup>1</sup>K V A K<sup>1</sup>S P<sup>1</sup>K<sup>1</sup>K<sup>1</sup>A<sup>1</sup>K V A<sup>1</sup>K P<sup>1</sup>K<sup>1</sup>  
K<sup>1</sup>A<sup>1</sup>A K<sup>1</sup>S<sup>1</sup>A<sup>1</sup>A<sup>1</sup>K A V<sup>1</sup>K P K A A<sup>1</sup>K P<sup>1</sup>K V V<sup>1</sup>K P<sup>1</sup>K<sup>1</sup>K A<sup>1</sup>A  
P<sup>1</sup>K K K

H12acT146ph\_m phase

ac-S E T<sup>1</sup>A P A A P A A A P P A E K<sup>1</sup>A P V<sup>1</sup>K<sup>1</sup>K<sup>1</sup>A<sup>1</sup>A<sup>1</sup>K<sup>1</sup>K<sup>1</sup>  
A<sup>1</sup>G<sup>1</sup>G<sup>1</sup>T P<sup>1</sup>R<sup>1</sup>K<sup>1</sup>A S<sup>1</sup>G P P V<sup>1</sup>S<sup>1</sup>E<sup>1</sup>L I T<sup>1</sup>K A<sup>1</sup>V<sup>1</sup>A<sup>1</sup>A<sup>1</sup>S<sup>1</sup>K<sup>1</sup>E<sup>1</sup>  
R<sup>1</sup>S<sup>1</sup>G V<sup>1</sup>S L<sup>1</sup>A<sup>1</sup>A<sup>1</sup>L<sup>1</sup>K<sup>1</sup>K<sup>1</sup>A<sup>1</sup>L A A A G Y<sup>1</sup>D V<sup>1</sup>E<sup>1</sup>K<sup>1</sup>N<sup>1</sup>N<sup>1</sup>S R  
I K<sup>1</sup>L G<sup>1</sup>L K S L V S K G T L V Q<sup>1</sup>T<sup>1</sup>K G T G A S G S F  
K L N K K A A S G<sup>1</sup>E A<sup>1</sup>K P K V K K A G G T<sup>1</sup>K P K<sup>1</sup>K P  
V G A A K<sup>1</sup>K P K<sup>1</sup>K<sup>1</sup>A A G G A<sup>1</sup>T<sup>ph</sup> P K K S A K K T P K<sup>1</sup>K  
A K K P A A A T V T K K V A K S P<sup>1</sup>K<sup>1</sup>K<sup>1</sup>A<sup>1</sup>K V A<sup>1</sup>K P<sup>1</sup>K<sup>1</sup>  
K<sup>1</sup>A<sup>1</sup>A K<sup>1</sup>S<sup>1</sup>A<sup>1</sup>A<sup>1</sup>K A V<sup>1</sup>K P K A A<sup>1</sup>K P<sup>1</sup>K V V<sup>1</sup>K P<sup>1</sup>K<sup>1</sup>K A<sup>1</sup>A  
P<sup>1</sup>K K K

H14ph\_m phase

<sup>ph</sup>S E T A P A A P A<sup>1</sup>A P A P A E K<sup>1</sup>T P V K<sup>1</sup>K K A R K S  
A G A A K R<sup>1</sup>K A S G P P V S<sup>1</sup>E L I T K A V<sup>1</sup>A A S<sup>1</sup>K E<sup>1</sup>  
R S G V S L<sup>1</sup>A A L K K A L A A A G Y<sup>1</sup>D V E K N N S R  
I K<sup>1</sup>L G<sup>1</sup>L K S L V S K G T L V Q<sup>1</sup>T<sup>1</sup>K G T G A S G S F  
K L N K K A A S G<sup>1</sup>E A<sup>1</sup>K P K A K K A G A A K A K K P  
A G<sup>1</sup>A A K<sup>1</sup>K P K K A T<sup>1</sup>G A A T P K K<sup>1</sup>S A K K T P K<sup>1</sup>K  
A K<sup>1</sup>K P A A A A G<sup>1</sup>A K K A K<sup>1</sup>S P<sup>1</sup>K<sup>1</sup>K<sup>1</sup>A<sup>1</sup>K<sup>1</sup>A A<sup>1</sup>K P K<sup>1</sup>K  
A P K<sup>1</sup>S P<sup>1</sup>A<sup>1</sup>K<sup>1</sup>A<sup>1</sup>K<sup>1</sup>A V<sup>1</sup>K P<sup>1</sup>K<sup>1</sup>A A<sup>1</sup>K P K T A<sup>1</sup>K P<sup>1</sup>K A A<sup>1</sup>  
K P<sup>1</sup>K<sup>1</sup>K A<sup>1</sup>A<sup>1</sup>K K K

H14ac\_m phase

ac-S E T A P<sup>1</sup>A A P A<sup>1</sup>A P A P A E K<sup>1</sup>T P V K<sup>1</sup>K K<sup>1</sup>A R K<sup>1</sup>S  
A<sup>1</sup>G<sup>1</sup>A A K R<sup>1</sup>K<sup>1</sup>A S<sup>1</sup>G P P V<sup>1</sup>S<sup>1</sup>E<sup>1</sup>L I T<sup>1</sup>K<sup>1</sup>A V<sup>1</sup>A<sup>1</sup>A<sup>1</sup>S<sup>1</sup>K<sup>1</sup>E<sup>1</sup>  
R<sup>1</sup>S<sup>1</sup>G<sup>1</sup>V<sup>1</sup>S<sup>1</sup>L<sup>1</sup>A<sup>1</sup>A<sup>1</sup>L<sup>1</sup>K<sup>1</sup>K<sup>1</sup>A<sup>1</sup>L<sup>1</sup>A A<sup>1</sup>A G Y<sup>1</sup>D V<sup>1</sup>E<sup>1</sup>K<sup>1</sup>N<sup>1</sup>N<sup>1</sup>S<sup>1</sup>R  
I K<sup>1</sup>L G<sup>1</sup>L K<sup>1</sup>S<sup>1</sup>L<sup>1</sup>V<sup>1</sup>S<sup>1</sup>K<sup>1</sup>G T<sup>1</sup>L V<sup>1</sup>Q<sup>1</sup>T<sup>1</sup>K G T G<sup>1</sup>A S G<sup>1</sup>S<sup>1</sup>F  
K L N<sup>1</sup>K K A A S G<sup>1</sup>E A<sup>1</sup>K P<sup>1</sup>K<sup>1</sup>A K K A<sup>1</sup>G<sup>1</sup>A A<sup>1</sup>K A K<sup>1</sup>K P  
A<sup>1</sup>G<sup>1</sup>A A K<sup>1</sup>K P K<sup>1</sup>K<sup>1</sup>A T<sup>1</sup>G A A<sup>1</sup>T P K<sup>1</sup>K<sup>1</sup>S<sup>1</sup>A<sup>1</sup>K K T P K<sup>1</sup>K  
A K<sup>1</sup>K P A<sup>1</sup>A A<sup>1</sup>A<sup>1</sup>G<sup>1</sup>A<sup>1</sup>K<sup>1</sup>K A<sup>1</sup>K<sup>1</sup>S P<sup>1</sup>K<sup>1</sup>K<sup>1</sup>A<sup>1</sup>K<sup>1</sup>A A<sup>1</sup>K P K<sup>1</sup>K  
A P K S P<sup>1</sup>A<sup>1</sup>K<sup>1</sup>A<sup>1</sup>K A V<sup>1</sup>K P K A A K P K T A<sup>1</sup>K P<sup>1</sup>K A A<sup>1</sup>  
K P<sup>1</sup>K<sup>1</sup>K A<sup>1</sup>A<sup>1</sup>K K K

H14acph\_m phase

ac-S E T<sup>1</sup>A P<sup>1</sup>A A P A<sup>1</sup>A P A P A E K<sup>1</sup>T P V K<sup>1</sup>K K<sup>1</sup>A<sup>1</sup>R<sup>1</sup>K S  
A G<sup>1</sup>A<sup>1</sup>A<sup>1</sup>K<sup>1</sup>R<sup>1</sup>K<sup>1</sup>A S<sup>1</sup>G P P V<sup>1</sup>S<sup>1</sup>E<sup>1</sup>L I T<sup>1</sup>K<sup>1</sup>A<sup>1</sup>V<sup>1</sup>A<sup>1</sup>A<sup>1</sup>S<sup>1</sup>K<sup>1</sup>E<sup>1</sup>  
R<sup>1</sup>S<sup>1</sup>G<sup>1</sup>V<sup>1</sup>S<sup>1</sup>L<sup>1</sup>A<sup>1</sup>A<sup>1</sup>L<sup>1</sup>K<sup>1</sup>K<sup>1</sup>A<sup>1</sup>L<sup>1</sup>A A<sup>1</sup>A<sup>1</sup>G<sup>1</sup>Y<sup>1</sup>D V<sup>1</sup>E<sup>1</sup>K<sup>1</sup>N<sup>1</sup>N<sup>1</sup>S R  
I K<sup>1</sup>L G<sup>1</sup>L K S<sup>1</sup>L<sup>1</sup>V<sup>1</sup>S<sup>1</sup>K G T L V<sup>1</sup>Q<sup>1</sup>T<sup>1</sup>K G T G A S G<sup>1</sup>S<sup>1</sup>F  
K L<sup>1</sup>N K K A A S G<sup>1</sup>E A<sup>1</sup>K P<sup>1</sup>K<sup>1</sup>A K K A<sup>1</sup>G<sup>1</sup>A A<sup>1</sup>K A K<sup>1</sup>K P  
A G<sup>1</sup>A A K<sup>1</sup>K P K K A T<sup>1</sup>G A A<sup>1</sup>T P K<sup>1</sup>K<sup>1</sup>S<sup>1</sup>A<sup>1</sup>K K T P K<sup>1</sup>K<sup>1</sup>  
A K K P A A A A<sup>1</sup>A<sup>1</sup>G<sup>1</sup>A<sup>1</sup>K<sup>1</sup>K A K<sup>1</sup>S<sup>1</sup> P<sup>1</sup>K<sup>1</sup>K<sup>1</sup>A<sup>1</sup>K<sup>1</sup>A A<sup>1</sup>K P K<sup>1</sup>K  
A P K S P<sup>1</sup>A<sup>1</sup>K<sup>1</sup>A<sup>1</sup>K A V<sup>1</sup>K P<sup>1</sup>K<sup>1</sup>A A<sup>1</sup>K P K T A<sup>1</sup>K P<sup>1</sup>K A A<sup>1</sup>  
K P<sup>1</sup>K<sup>1</sup>K A<sup>1</sup>A<sup>1</sup>K K K

H14acph2\_m phase

ac-S E T<sup>1</sup>A P A A P A<sup>1</sup>A P<sup>1</sup>A P A E<sup>1</sup>K<sup>1</sup>T P V K<sup>1</sup>K<sup>1</sup>A<sup>1</sup>R<sup>1</sup>K<sup>1</sup>S<sup>1</sup>  
A<sup>1</sup>G<sup>1</sup>A<sup>1</sup>A<sup>1</sup>K<sup>1</sup>R<sup>1</sup>K<sup>1</sup>A<sup>1</sup>S<sup>1</sup>G P P V<sup>1</sup>S<sup>1</sup>E<sup>1</sup>L I T<sup>1</sup>K<sup>1</sup>A<sup>1</sup>V<sup>1</sup>A<sup>1</sup>A<sup>1</sup>S<sup>1</sup>K E<sup>1</sup>  
R<sup>1</sup>S<sup>1</sup>G V<sup>1</sup>S<sup>1</sup>L<sup>1</sup>A<sup>1</sup>L<sup>1</sup>K<sup>1</sup>K<sup>1</sup>A<sup>1</sup>L<sup>1</sup>A A A G<sup>1</sup>Y<sup>1</sup>D V<sup>1</sup>E<sup>1</sup>K<sup>1</sup>N<sup>1</sup>N<sup>1</sup>S R  
I K<sup>1</sup>L<sup>1</sup>G<sup>1</sup>L K<sup>1</sup>S<sup>1</sup>L<sup>1</sup>V<sup>1</sup>S<sup>1</sup>K G T L V<sup>1</sup>Q<sup>1</sup>T<sup>1</sup>K G T<sup>1</sup>G A S G<sup>1</sup>S<sup>1</sup>F<sup>1</sup>  
K L<sup>1</sup>N<sup>1</sup>K K A A S G<sup>1</sup>E A<sup>1</sup>K P<sup>1</sup>K<sup>1</sup>A K K A<sup>1</sup>G<sup>1</sup>A A<sup>1</sup>K A K<sup>1</sup>K P  
A G A A K<sup>1</sup>K P K<sup>1</sup>K<sup>1</sup>A T G A A T P K K<sup>1</sup>S A K K T P K<sup>1</sup>K<sup>1</sup>  
A K K P A A A<sup>1</sup>A<sup>1</sup>G<sup>1</sup>A<sup>1</sup>K<sup>1</sup>A K<sup>1</sup>A K<sup>1</sup>S<sup>1</sup> P K<sup>1</sup>K<sup>1</sup>A<sup>1</sup>K A A<sup>1</sup>K P K K  
A P K<sup>1</sup>S<sup>1</sup> P<sup>1</sup>A<sup>1</sup>K<sup>1</sup>A<sup>1</sup>K A V<sup>1</sup>K P<sup>1</sup>K A A<sup>1</sup>K P K T A<sup>1</sup>K P<sup>1</sup>K A A<sup>1</sup>  
K P<sup>1</sup>K<sup>1</sup>K<sup>1</sup>A<sup>1</sup>A<sup>1</sup>K K K

H14acph3\_m phase

ac-S E T<sup>1</sup>A P A A P A A P A P A E<sup>1</sup>K<sup>1</sup>T<sup>ph</sup> P<sup>1</sup>V K<sup>1</sup>K<sup>1</sup>A<sup>1</sup>R<sup>1</sup>K<sup>1</sup>S<sup>1</sup>  
A<sup>1</sup>G<sup>1</sup>A<sup>1</sup>A<sup>1</sup>K<sup>1</sup>R<sup>1</sup>K<sup>1</sup>A<sup>1</sup>S<sup>1</sup>G P P V<sup>1</sup>S<sup>1</sup>E<sup>1</sup>L I T<sup>1</sup>K<sup>1</sup>A<sup>1</sup>V<sup>1</sup>A<sup>1</sup>A<sup>1</sup>S<sup>1</sup>K E<sup>1</sup>  
R<sup>1</sup>S<sup>1</sup>G V<sup>1</sup>S<sup>1</sup>L<sup>1</sup>A<sup>1</sup>L<sup>1</sup>K<sup>1</sup>K<sup>1</sup>A<sup>1</sup>L<sup>1</sup>A A A G<sup>1</sup>Y<sup>1</sup>D V<sup>1</sup>E<sup>1</sup>K<sup>1</sup>N<sup>1</sup>N<sup>1</sup>S R  
I K<sup>1</sup>L<sup>1</sup>G<sup>1</sup>L K S<sup>1</sup>L<sup>1</sup>V<sup>1</sup>S<sup>1</sup>K G T L V<sup>1</sup>Q<sup>1</sup>T<sup>1</sup>K G T<sup>1</sup>G A S G<sup>1</sup>S<sup>1</sup>F<sup>1</sup>  
K L<sup>1</sup>N<sup>1</sup>K K A A S G<sup>1</sup>E A<sup>1</sup>K P<sup>1</sup>K<sup>1</sup>A K K A<sup>1</sup>G<sup>1</sup>A A<sup>1</sup>K A K K P  
A G A A K<sup>1</sup>K P K<sup>1</sup>K<sup>1</sup>A T G A A T P K<sup>1</sup>K<sup>1</sup>S<sup>1</sup>A<sup>1</sup>K<sup>1</sup>K<sup>1</sup>T P K<sup>1</sup>K<sup>1</sup>  
A K K P A A<sup>1</sup>A<sup>1</sup>A<sup>1</sup>G<sup>1</sup>A<sup>1</sup>K<sup>1</sup>A K<sup>1</sup>S<sup>1</sup> P<sup>1</sup>K<sup>1</sup>K<sup>1</sup>A<sup>1</sup>K A A<sup>1</sup>K P<sup>1</sup>K<sup>1</sup>K  
A P K<sup>1</sup>S<sup>1</sup> P<sup>1</sup>A<sup>1</sup>K<sup>1</sup>A<sup>1</sup>K A V<sup>1</sup>K P<sup>1</sup>K A A<sup>1</sup>K P K T A<sup>1</sup>K P<sup>1</sup>K A A<sup>1</sup>  
K P<sup>1</sup>K<sup>1</sup>K<sup>1</sup>A<sup>1</sup>A<sup>1</sup>K K K

H14acph4 m phase

ac-S E T<sup>1</sup>A P A A P A A P A P A E<sup>1</sup>K<sup>1</sup>T<sup>ph</sup> P<sup>1</sup>V K<sup>1</sup>K<sup>1</sup>A<sup>1</sup>R<sup>1</sup>K<sup>1</sup>S<sup>1</sup>  
A<sup>1</sup>G<sup>1</sup>A<sup>1</sup>A<sup>1</sup>K<sup>1</sup>R<sup>1</sup>K<sup>1</sup>A<sup>1</sup>S<sup>1</sup>G P P V<sup>1</sup>S<sup>1</sup>E<sup>1</sup>L I T<sup>1</sup>K<sup>1</sup>A<sup>1</sup>V<sup>1</sup>A<sup>1</sup>A<sup>1</sup>S<sup>1</sup>K E<sup>1</sup>  
R<sup>1</sup>S<sup>1</sup>G V<sup>1</sup>S<sup>1</sup>L<sup>1</sup>A<sup>1</sup>L<sup>1</sup>K<sup>1</sup>K<sup>1</sup>A<sup>1</sup>L<sup>1</sup>A A A G<sup>1</sup>Y<sup>1</sup>D V<sup>1</sup>E<sup>1</sup>K<sup>1</sup>N<sup>1</sup>N<sup>1</sup>S R  
I K<sup>1</sup>L<sup>1</sup>G<sup>1</sup>L K S<sup>1</sup>L<sup>1</sup>V<sup>1</sup>S<sup>1</sup>K G T L V<sup>1</sup>Q<sup>1</sup>T<sup>1</sup>K G T<sup>1</sup>G A S G<sup>1</sup>S<sup>1</sup>F<sup>1</sup>  
K L<sup>1</sup>N<sup>1</sup>K K A A S G<sup>1</sup>E A<sup>1</sup>K P<sup>1</sup>K<sup>1</sup>A K K A<sup>1</sup>G<sup>1</sup>A A<sup>1</sup>K A K<sup>1</sup>K P  
A G A A K<sup>1</sup>K P K<sup>1</sup>K<sup>1</sup>A T G A A<sup>1</sup>T<sup>ph</sup> P K<sup>1</sup>S A K K T P K<sup>1</sup>K<sup>1</sup>  
A K<sup>1</sup>K P A<sup>1</sup>A<sup>1</sup>A<sup>1</sup>G<sup>1</sup>A<sup>1</sup>K<sup>1</sup>A K<sup>1</sup>S<sup>1</sup> P<sup>1</sup>K<sup>1</sup>K<sup>1</sup>A<sup>1</sup>K A A<sup>1</sup>K P<sup>1</sup>K<sup>1</sup>K<sup>1</sup>  
A P K<sup>1</sup>S<sup>1</sup> P<sup>1</sup>A<sup>1</sup>K<sup>1</sup>A<sup>1</sup>K A V<sup>1</sup>K P<sup>1</sup>K A A<sup>1</sup>K P K T A<sup>1</sup>K P<sup>1</sup>K A A<sup>1</sup>  
K P<sup>1</sup>K<sup>1</sup>K<sup>1</sup>A<sup>1</sup>A<sup>1</sup>K K K

H14acph5\_m phase

ac-S E T<sup>1</sup>A P A A P A A P A P A E<sup>1</sup>K<sup>1</sup>T<sup>ph</sup> P<sup>1</sup>V K<sup>1</sup>K<sup>1</sup>A<sup>1</sup>R<sup>1</sup>K<sup>1</sup>S<sup>1</sup>  
A<sup>1</sup>G<sup>1</sup>A<sup>1</sup>A<sup>1</sup>K<sup>1</sup>R<sup>1</sup>K<sup>1</sup>A<sup>1</sup>S<sup>1</sup>G P P V<sup>1</sup>S<sup>1</sup>E<sup>1</sup>L I T<sup>1</sup>K<sup>1</sup>A<sup>1</sup>V<sup>1</sup>A<sup>1</sup>A<sup>1</sup>S<sup>1</sup>K E<sup>1</sup>  
R<sup>1</sup>S<sup>1</sup>G V<sup>1</sup>S<sup>1</sup>L<sup>1</sup>A<sup>1</sup>L<sup>1</sup>K<sup>1</sup>A<sup>1</sup>L A A A G<sup>1</sup>Y<sup>1</sup>D V<sup>1</sup>E<sup>1</sup>K<sup>1</sup>N<sup>1</sup>N<sup>1</sup>S R  
I K<sup>1</sup>L<sup>1</sup>G<sup>1</sup>L K S<sup>1</sup>L<sup>1</sup>V<sup>1</sup>S<sup>1</sup>K G T L V<sup>1</sup>Q<sup>1</sup>T<sup>1</sup>K G T<sup>1</sup>G A S G<sup>1</sup>S<sup>1</sup>F  
K L<sup>1</sup>N<sup>1</sup>K K A A S G<sup>1</sup>E A<sup>1</sup>K P<sup>1</sup>K<sup>1</sup>A K K A<sup>1</sup>G A A K A K K P  
A G A A K<sup>1</sup>K P K<sup>1</sup>K<sup>1</sup>A T G A A<sup>1</sup>T<sup>ph</sup> P K<sup>1</sup>K<sup>1</sup>S A<sup>1</sup>K<sup>1</sup>K<sup>1</sup>T<sup>ph</sup> P K<sup>1</sup>K<sup>1</sup>  
A K<sup>1</sup>K P A A<sup>1</sup>A<sup>1</sup>A<sup>1</sup>G<sup>1</sup>A<sup>1</sup>K<sup>1</sup>A K<sup>1</sup>A K<sup>1</sup>S<sup>1</sup> P K<sup>1</sup>K<sup>1</sup>A<sup>1</sup>K A A<sup>1</sup>K P<sup>1</sup>K K  
A P K<sup>1</sup>S<sup>1</sup> P<sup>1</sup>A<sup>1</sup>K<sup>1</sup>A<sup>1</sup>K A V<sup>1</sup>K P<sup>1</sup>K A A<sup>1</sup>K P K T A<sup>1</sup>K P<sup>1</sup>K A A<sup>1</sup>  
K P<sup>1</sup>K<sup>1</sup>K<sup>1</sup>A<sup>1</sup>A<sup>1</sup>K K K

H12 ac\_asyn

ac-S E T A P A A P A A A P P A E K<sup>1</sup>A P V K K<sup>1</sup>K<sup>1</sup>A<sup>1</sup>K<sup>1</sup>K<sup>1</sup>  
 A<sup>1</sup>G<sup>1</sup>G<sup>1</sup>T P R<sup>1</sup>K A S<sup>1</sup>G P P P V<sup>1</sup>S<sup>1</sup>E<sup>1</sup>L I T<sup>1</sup>K A V<sup>1</sup>A<sup>1</sup>A<sup>1</sup>S<sup>1</sup>K<sup>1</sup>E<sup>1</sup>  
 R<sup>1</sup>S<sup>1</sup>G V<sup>1</sup>S<sup>1</sup>L<sup>1</sup>A<sup>1</sup>A<sup>1</sup>L<sup>1</sup>K<sup>1</sup>K<sup>1</sup>A L A A A G Y<sup>1</sup>D V<sup>1</sup>E<sup>1</sup>K<sup>1</sup>N<sup>1</sup>N<sup>1</sup>S R  
 I K<sup>1</sup>L G<sup>1</sup>L K S L V S K G T L V<sup>1</sup>Q<sup>1</sup>T K G T G A S G S F  
 K L N K K A A S G<sup>1</sup>E A K P K V K K A G G T<sup>1</sup>K P K K P  
 V G A A K<sup>1</sup>K P K K<sup>1</sup>A A G G A<sup>1</sup>T P K K S A K K T P K K  
 A K<sup>1</sup>K P A A A T V<sup>1</sup>T<sup>1</sup>K<sup>1</sup>K<sup>1</sup>V A K<sup>1</sup>S P K<sup>1</sup>K<sup>1</sup>A K V A<sup>1</sup>K P K  
 K A A K<sup>1</sup>S<sup>1</sup>A<sup>1</sup>A<sup>1</sup>K A V<sup>1</sup>K P K A A<sup>1</sup>K P K V V K P K K A<sup>1</sup>A  
 P<sup>1</sup>K K K

H12 acph\_asyn

ac-S E T<sup>1</sup>A P A A P A A A P P A E K<sup>1</sup>A P V<sup>1</sup>K<sup>1</sup>K<sup>1</sup>A<sup>1</sup>A<sup>1</sup>K<sup>1</sup>K<sup>1</sup>  
 A<sup>1</sup>G<sup>1</sup>G<sup>1</sup>T P<sup>1</sup>R<sup>1</sup>K<sup>1</sup>A S<sup>1</sup>G P P P V<sup>1</sup>S<sup>1</sup>E<sup>1</sup>L I T<sup>1</sup>K<sup>1</sup>A V<sup>1</sup>A<sup>1</sup>A<sup>1</sup>S<sup>1</sup>K<sup>1</sup>E<sup>1</sup>  
 R<sup>1</sup>S<sup>1</sup>G V S L<sup>1</sup>A<sup>1</sup>A L K<sup>1</sup>K<sup>1</sup>A L A A A G Y<sup>1</sup>D V<sup>1</sup>E<sup>1</sup>K<sup>1</sup>N<sup>1</sup>N<sup>1</sup>S R  
 I K<sup>1</sup>L G<sup>1</sup>L K S L V S K G T L V<sup>1</sup>Q<sup>1</sup>T K G T G A S G S F  
 K L N K K A A S G<sup>1</sup>E A<sup>1</sup>K P K V K K A G G T<sup>1</sup>K P K<sup>1</sup>K P  
 V G A A K K P K<sup>1</sup>K<sup>1</sup>A A G G A<sup>1</sup>T P K K<sup>1</sup>S<sup>1</sup>A K K<sup>1</sup>T P K<sup>1</sup>K<sup>1</sup>  
 A K<sup>1</sup>K P A A A<sup>1</sup>T V<sup>1</sup>T<sup>1</sup>K<sup>1</sup>K<sup>1</sup>V A K<sup>1</sup>S<sup>1</sup> P<sup>1</sup>K<sup>1</sup>K<sup>1</sup>A<sup>1</sup>K V A<sup>1</sup>K P K  
 K<sup>1</sup>A A K<sup>1</sup>S<sup>1</sup>A<sup>1</sup>A<sup>1</sup>K A V<sup>1</sup>K P K A A<sup>1</sup>K P<sup>1</sup>K V V<sup>1</sup>K P<sup>1</sup>K<sup>1</sup>K A<sup>1</sup>A  
 P<sup>1</sup>K K K

H12SNPac\_asyn

ac-S E T<sup>1</sup>A P A A P A A A P P A E K<sup>1</sup>V P<sup>1</sup>V<sup>1</sup>K<sup>1</sup>K<sup>1</sup>A<sup>1</sup>A<sup>1</sup>K<sup>1</sup>K<sup>1</sup>  
 A G<sup>1</sup>G<sup>1</sup>T P R<sup>1</sup>K A<sup>1</sup>S<sup>1</sup>G P P P V<sup>1</sup>S<sup>1</sup>E<sup>1</sup>L I T<sup>1</sup>K A V<sup>1</sup>A<sup>1</sup>A<sup>1</sup>S<sup>1</sup>K<sup>1</sup>E<sup>1</sup>  
 R<sup>1</sup>S<sup>1</sup>G V<sup>1</sup>S<sup>1</sup>L<sup>1</sup>A<sup>1</sup>A<sup>1</sup>L<sup>1</sup>K<sup>1</sup>K<sup>1</sup>A<sup>1</sup>L A A A G Y<sup>1</sup>D V<sup>1</sup>E<sup>1</sup>K<sup>1</sup>N<sup>1</sup>N<sup>1</sup>S R  
 I K<sup>1</sup>L<sup>1</sup>G<sup>1</sup>L K<sup>1</sup>S<sup>1</sup>L V<sup>1</sup>S<sup>1</sup>K G T L V<sup>1</sup>Q<sup>1</sup>T K G T G A S G<sup>1</sup>S F<sup>1</sup>  
 K L N K K A A S G<sup>1</sup>E A<sup>1</sup>[K P<sup>1</sup>K V K K A G G T<sup>1</sup>K P K<sup>1</sup>K P  
 V G A A K<sup>1</sup>K P K<sup>1</sup>K<sup>1</sup>A A G G A<sup>1</sup>T P K K<sup>1</sup>S A K K T P K K  
 A K K P A A A T<sup>1</sup>V<sup>1</sup>T<sup>1</sup>K<sup>1</sup>K<sup>1</sup>V A K<sup>1</sup>S P K<sup>1</sup>K A K V A K P<sup>1</sup>K  
 K A A K<sup>1</sup>S<sup>1</sup>A<sup>1</sup>A<sup>1</sup>K A V<sup>1</sup>K P K A A<sup>1</sup>K P<sup>1</sup>K V V<sup>1</sup>K P K K A<sup>1</sup>A  
 P<sup>1</sup>K K K

H12SNPacph\_asyn

ac-S E T A P A A P A A A P P A E K<sup>1</sup>V P<sup>1</sup>V<sup>1</sup>K<sup>1</sup>K<sup>1</sup>A<sup>1</sup>A<sup>1</sup>K<sup>1</sup>K<sup>1</sup>  
 A G G<sup>1</sup>T P R<sup>1</sup>K A S<sup>1</sup>G P P P V<sup>1</sup>S<sup>1</sup>E<sup>1</sup>L I T<sup>1</sup>K A V<sup>1</sup>A<sup>1</sup>A<sup>1</sup>S<sup>1</sup>K<sup>1</sup>E<sup>1</sup>  
 R<sup>1</sup>S<sup>1</sup>G V S L<sup>1</sup>A<sup>1</sup>A<sup>1</sup>L<sup>1</sup>K<sup>1</sup>K<sup>1</sup>A L A A A G Y<sup>1</sup>D V<sup>1</sup>E<sup>1</sup>K<sup>1</sup>N<sup>1</sup>N<sup>1</sup>S R  
 I K<sup>1</sup>L G<sup>1</sup>L K S L V S K G T L V<sup>1</sup>Q<sup>1</sup>T K G T G A S G S F  
 K L N K K A A S G<sup>1</sup>E A K P K V K K A G G T<sup>1</sup>K P K<sup>1</sup>K P  
 V G A A K K P K K A A G G A<sup>1</sup>T P K K<sup>1</sup>S<sup>1</sup>A K K T P K K  
 A K<sup>1</sup>K P A A A T<sup>1</sup>V<sup>1</sup>T<sup>1</sup>K<sup>1</sup>K<sup>1</sup>V A K<sup>1</sup>S<sup>1</sup> P<sup>1</sup>K<sup>1</sup>K<sup>1</sup>A<sup>1</sup>K V A<sup>1</sup>K P K  
 K A A K<sup>1</sup>S<sup>1</sup>A<sup>1</sup>A<sup>1</sup>K A V<sup>1</sup>K P K A A<sup>1</sup>K P K V V<sup>1</sup>K P<sup>1</sup>K K A<sup>1</sup>A  
 P<sup>1</sup>K K K

H13 ac\_asyn

ac-S E T A P<sup>1</sup>L A P T I P A P A E K<sup>1</sup>T P V K<sup>1</sup>K<sup>1</sup>A<sup>1</sup>K<sup>1</sup>K<sup>1</sup>A<sup>1</sup>  
 G<sup>1</sup>A<sup>1</sup>T<sup>1</sup>A<sup>1</sup>G<sup>1</sup>K<sup>1</sup>R<sup>1</sup>K A S G P P P V<sup>1</sup>S<sup>1</sup>E<sup>1</sup>L I T<sup>1</sup>K<sup>1</sup>A V<sup>1</sup>A<sup>1</sup>A<sup>1</sup>S<sup>1</sup>K<sup>1</sup>  
 E<sup>1</sup>R<sup>1</sup>S<sup>1</sup>G V<sup>1</sup>S<sup>1</sup>L<sup>1</sup>A<sup>1</sup>A<sup>1</sup>L<sup>1</sup>K<sup>1</sup>K<sup>1</sup>A<sup>1</sup>L<sup>1</sup>A A<sup>1</sup>A G<sup>1</sup>Y<sup>1</sup>D V<sup>1</sup>E<sup>1</sup>K<sup>1</sup>N<sup>1</sup>N<sup>1</sup>S  
 R I K<sup>1</sup>L G<sup>1</sup>L K S<sup>1</sup>L<sup>1</sup>V<sup>1</sup>S<sup>1</sup>K G T L V<sup>1</sup>Q<sup>1</sup>T<sup>1</sup>K G T G A S G<sup>1</sup>S  
 F<sup>1</sup>K L N K K A A S G<sup>1</sup>E G K P K A K K A G A A K P R K  
 P A G A A K K P K<sup>1</sup>K<sup>1</sup>V A G A A T P K K<sup>1</sup>S I K K T P K<sup>1</sup>  
 K V K K P A T A A G<sup>1</sup>T<sup>1</sup>K<sup>1</sup>K V A<sup>1</sup>K<sup>1</sup>S<sup>1</sup>A<sup>1</sup>K<sup>1</sup>K<sup>1</sup>V K<sup>1</sup>T P<sup>1</sup>Q P  
 K<sup>1</sup>K A<sup>1</sup>A K S P<sup>1</sup>A<sup>1</sup>K<sup>1</sup>A K A P<sup>1</sup>K P K A A<sup>1</sup>K P K S G<sup>1</sup>K P K  
 V T<sup>1</sup>K<sup>1</sup>A<sup>1</sup>K<sup>1</sup>K A<sup>1</sup>A P<sup>1</sup>K K K

H14ac asyn

ac-S E T A P A A P A<sup>1</sup>A P A P A E K<sup>1</sup>T P V K<sup>1</sup>K<sup>1</sup>A<sup>1</sup>R<sup>1</sup>K<sup>1</sup>S<sup>1</sup>  
 A<sup>1</sup>G<sup>1</sup>A<sup>1</sup>A<sup>1</sup>K<sup>1</sup>R<sup>1</sup>K<sup>1</sup>A<sup>1</sup>S<sup>1</sup>G P P P V<sup>1</sup>S<sup>1</sup>E<sup>1</sup>L I T<sup>1</sup>K<sup>1</sup>A V<sup>1</sup>A<sup>1</sup>A<sup>1</sup>S<sup>1</sup>K<sup>1</sup>E<sup>1</sup>  
 R<sup>1</sup>S<sup>1</sup>G V<sup>1</sup>S<sup>1</sup>L<sup>1</sup>A<sup>1</sup>A<sup>1</sup>L<sup>1</sup>K<sup>1</sup>K<sup>1</sup>A<sup>1</sup>L<sup>1</sup>A A<sup>1</sup>A G<sup>1</sup>Y<sup>1</sup>D V<sup>1</sup>E<sup>1</sup>K<sup>1</sup>N<sup>1</sup>N<sup>1</sup>S R  
 I K<sup>1</sup>L<sup>1</sup>G<sup>1</sup>L K S<sup>1</sup>L<sup>1</sup>V<sup>1</sup>S<sup>1</sup>K G T L V<sup>1</sup>Q<sup>1</sup>T<sup>1</sup>K G T G A S G<sup>1</sup>S F<sup>1</sup>  
 K L N K K A A S G<sup>1</sup>E A K P K<sup>1</sup>A K K A<sup>1</sup>G<sup>1</sup>A<sup>1</sup>A<sup>1</sup>K<sup>1</sup>A K<sup>1</sup>K P  
 A G A A K<sup>1</sup>K P K<sup>1</sup>K<sup>1</sup>A T G A A<sup>1</sup>T P K<sup>1</sup>K<sup>1</sup>S<sup>1</sup>A K K T P K<sup>1</sup>K  
 A K<sup>1</sup>K P A A A<sup>1</sup>A<sup>1</sup>G<sup>1</sup>A<sup>1</sup>K<sup>1</sup>K A K<sup>1</sup>S P<sup>1</sup>K<sup>1</sup>K<sup>1</sup>A<sup>1</sup>K<sup>1</sup>A A<sup>1</sup>K P K<sup>1</sup>K  
 A P K<sup>1</sup>S P<sup>1</sup>A<sup>1</sup>K<sup>1</sup>A<sup>1</sup>K A V<sup>1</sup>K P K A A<sup>1</sup>K P K T A<sup>1</sup>K P<sup>1</sup>K A A<sup>1</sup>  
 K P<sup>1</sup>K<sup>1</sup>K A<sup>1</sup>A<sup>1</sup>K K K

# MCF-10A

# Figure S3

## H14acph\_asyn

## H14acph2\_asyn

## H14acph3\_asyn

ac-S E T<sup>1</sup>A P A A P A<sup>1</sup>A P<sup>1</sup>A P<sup>1</sup>A E K<sup>1</sup>T P V K<sup>1</sup>K<sup>1</sup>A<sup>1</sup>R<sup>1</sup>K<sup>1</sup>S<sup>1</sup>  
A<sup>1</sup>G<sup>1</sup>A<sup>1</sup>A<sup>1</sup>K<sup>1</sup>R<sup>1</sup>K<sup>1</sup>A<sup>1</sup>S<sup>1</sup>G P P V<sup>1</sup>S<sup>1</sup>E<sup>1</sup>L I<sup>1</sup>T<sup>1</sup>K<sup>1</sup>A<sup>1</sup>V<sup>1</sup>A<sup>1</sup>A<sup>1</sup>S<sup>1</sup>K<sup>1</sup>E<sup>1</sup>  
R<sup>1</sup>S<sup>1</sup>G<sup>1</sup>V<sup>1</sup>S<sup>1</sup>L<sup>1</sup>A<sup>1</sup>A<sup>1</sup>L<sup>1</sup>K<sup>1</sup>K<sup>1</sup>A<sup>1</sup>L<sup>1</sup>A A A G<sup>1</sup>Y<sup>1</sup>D V<sup>1</sup>E<sup>1</sup>K<sup>1</sup>N<sup>1</sup>N<sup>1</sup>S R  
I K<sup>1</sup>L<sup>1</sup>G<sup>1</sup>L K S<sup>1</sup>L<sup>1</sup>V<sup>1</sup>S<sup>1</sup>K G T L V<sup>1</sup>Q<sup>1</sup>T<sup>1</sup>K G T G A S G<sup>1</sup>S F<sup>1</sup>  
K L N K K A A S G<sup>1</sup>E A<sup>1</sup>K P<sup>1</sup>K<sup>1</sup>A K K A G<sup>1</sup>A A<sup>1</sup>K A K<sup>1</sup>K P  
A G A A K<sup>1</sup>K P K<sup>1</sup>K<sup>1</sup>A T G A A<sup>1</sup>T P K<sup>1</sup>K<sup>1</sup>S<sup>1</sup>A K K T P K<sup>1</sup>K<sup>1</sup>  
A K K P A<sup>1</sup>A<sup>1</sup>A<sup>1</sup>G<sup>1</sup>A<sup>1</sup>K<sup>1</sup>K<sup>1</sup>A K<sup>1</sup>S<sup>1</sup>P K<sup>1</sup>K<sup>1</sup>A<sup>1</sup>K<sup>1</sup>A<sup>1</sup>A<sup>1</sup>K P K K  
A P K S P<sup>1</sup>A<sup>1</sup>K<sup>1</sup>A<sup>1</sup>K A V<sup>1</sup>K P K A A<sup>1</sup>K P K T A<sup>1</sup>K P<sup>1</sup>K A A<sup>1</sup>  
K P<sup>1</sup>K<sup>1</sup>K A<sup>1</sup>A<sup>1</sup>A<sup>1</sup>K K K

ac-S E T<sup>1</sup>A P A A P A<sup>1</sup>A P A P<sup>1</sup>A E K<sup>1</sup>T P V K<sup>1</sup>K<sup>1</sup>A<sup>1</sup>R<sup>1</sup>K<sup>1</sup>S<sup>1</sup>  
A<sup>1</sup>G<sup>1</sup>A<sup>1</sup>A<sup>1</sup>K<sup>1</sup>R<sup>1</sup>K<sup>1</sup>A<sup>1</sup>S<sup>1</sup>G P P V<sup>1</sup>S<sup>1</sup>E<sup>1</sup>L I<sup>1</sup>T<sup>1</sup>K<sup>1</sup>A<sup>1</sup>V<sup>1</sup>A<sup>1</sup>A<sup>1</sup>S<sup>1</sup>K<sup>1</sup>E<sup>1</sup>  
R<sup>1</sup>S<sup>1</sup>G<sup>1</sup>V<sup>1</sup>S<sup>1</sup>L<sup>1</sup>A<sup>1</sup>A<sup>1</sup>L<sup>1</sup>K<sup>1</sup>K<sup>1</sup>A<sup>1</sup>L<sup>1</sup>A A A G<sup>1</sup>Y<sup>1</sup>D V<sup>1</sup>E<sup>1</sup>K<sup>1</sup>N<sup>1</sup>N<sup>1</sup>S R  
I K<sup>1</sup>L<sup>1</sup>G<sup>1</sup>L K S<sup>1</sup>L<sup>1</sup>V<sup>1</sup>S<sup>1</sup>K G T L V<sup>1</sup>Q<sup>1</sup>T<sup>1</sup>K G T G A S G<sup>1</sup>S F<sup>1</sup>  
K L N K K A A S G<sup>1</sup>E A K P K A K K A G<sup>1</sup>A A<sup>1</sup>K A K K P  
A G A A K<sup>1</sup>K P K<sup>1</sup>K<sup>1</sup>A T G A A<sup>1</sup>T P K K<sup>1</sup>S A K<sup>1</sup>K<sup>1</sup>T P K K<sup>1</sup>  
A K<sup>1</sup>K P A A A<sup>1</sup>A<sup>1</sup>G<sup>1</sup>A<sup>1</sup>K<sup>1</sup>K A K<sup>1</sup>S<sup>1</sup>P K<sup>1</sup>K<sup>1</sup>A<sup>1</sup>K A A<sup>1</sup>K P K K  
A P K<sup>1</sup>S<sup>1</sup>P<sup>1</sup>A<sup>1</sup>K<sup>1</sup>A<sup>1</sup>K A V<sup>1</sup>K P<sup>1</sup>K A A<sup>1</sup>K P K T A<sup>1</sup>K P<sup>1</sup>K A A<sup>1</sup>  
K P<sup>1</sup>K<sup>1</sup>K A<sup>1</sup>A<sup>1</sup>A<sup>1</sup>K K K

ac-S E T<sup>1</sup>A P A A P A A P A P<sup>1</sup>A E K<sup>1</sup>T P V K<sup>1</sup>K<sup>1</sup>A R<sup>1</sup>K<sup>1</sup>S<sup>1</sup>  
A<sup>1</sup>G<sup>1</sup>A A K<sup>1</sup>R<sup>1</sup>K A S<sup>1</sup>G P P V<sup>1</sup>S<sup>1</sup>E<sup>1</sup>L I T K A V<sup>1</sup>A<sup>1</sup>A<sup>1</sup>S K E<sup>1</sup>  
R<sup>1</sup>S<sup>1</sup>G<sup>1</sup>V<sup>1</sup>S<sup>1</sup>L<sup>1</sup>A<sup>1</sup>A<sup>1</sup>L<sup>1</sup>K<sup>1</sup>K<sup>1</sup>A L A A A G Y<sup>1</sup>D V<sup>1</sup>E<sup>1</sup>K<sup>1</sup>N<sup>1</sup>N<sup>1</sup>S R  
I K<sup>1</sup>L<sup>1</sup>G<sup>1</sup>L K S L V S<sup>1</sup>K G T L V<sup>1</sup>Q<sup>1</sup>T K G T G A S G S F  
K L N K K A A S G<sup>1</sup>E A K P K A K K A G A A K A K K P  
A G A A K K P K K<sup>1</sup>A T G A A T P K K<sup>1</sup>S A K K T P K K  
A K K P A A A<sup>1</sup>A<sup>1</sup>G<sup>1</sup>A K K<sup>1</sup>A K<sup>1</sup>S<sup>1</sup>P K<sup>1</sup>K<sup>1</sup>A<sup>1</sup>K A A<sup>1</sup>K P K K  
A P K<sup>1</sup>S<sup>1</sup>P<sup>1</sup>A<sup>1</sup>K<sup>1</sup>A<sup>1</sup>K A V<sup>1</sup>K P K A A<sup>1</sup>K P K T A<sup>1</sup>K P K A A<sup>1</sup>  
K P K K A<sup>1</sup>A<sup>1</sup>A<sup>1</sup>K K K

# MCF-10A s phase

## H12ac\_s phase

## H12acph\_s phase

## H12SNPac\_s phase

ac-S E T A P A A P A A A P P A E K<sup>1</sup>A P V<sup>1</sup>K<sup>1</sup>K<sup>1</sup>A<sup>1</sup>A<sup>1</sup>K<sup>1</sup>  
A<sup>1</sup>G<sup>1</sup>T P R<sup>1</sup>K A S<sup>1</sup>G P P V<sup>1</sup>S<sup>1</sup>E<sup>1</sup>L I T<sup>1</sup>K<sup>1</sup>A<sup>1</sup>V<sup>1</sup>A<sup>1</sup>A<sup>1</sup>S<sup>1</sup>K<sup>1</sup>E<sup>1</sup>  
R<sup>1</sup>S<sup>1</sup>G<sup>1</sup>V<sup>1</sup>S<sup>1</sup>L<sup>1</sup>A<sup>1</sup>A<sup>1</sup>L<sup>1</sup>K<sup>1</sup>K<sup>1</sup>A<sup>1</sup>L A A A G<sup>1</sup>Y<sup>1</sup>D V<sup>1</sup>E<sup>1</sup>K<sup>1</sup>N<sup>1</sup>N<sup>1</sup>S R  
I K<sup>1</sup>L<sup>1</sup>G<sup>1</sup>L K S<sup>1</sup>L<sup>1</sup>V<sup>1</sup>S<sup>1</sup>K G T L V<sup>1</sup>Q<sup>1</sup>T<sup>1</sup>K G T G A S G<sup>1</sup>S F<sup>1</sup>  
K L N K K A A S G<sup>1</sup>E A K P K V K K A G G T K P K<sup>1</sup>K P  
V G A A K<sup>1</sup>K P K K<sup>1</sup>A A G G A<sup>1</sup>T P K<sup>1</sup>K<sup>1</sup>S A K K T P K<sup>1</sup>K  
A K K P A A A T V<sup>1</sup>T<sup>1</sup>K<sup>1</sup>K V A K<sup>1</sup>S<sup>1</sup>P K<sup>1</sup>K<sup>1</sup>A K V A<sup>1</sup>K P<sup>1</sup>K<sup>1</sup>  
K<sup>1</sup>A A K<sup>1</sup>S<sup>1</sup>A<sup>1</sup>A<sup>1</sup>K A V<sup>1</sup>K P K A A<sup>1</sup>K P<sup>1</sup>K V V<sup>1</sup>K P<sup>1</sup>K K A<sup>1</sup>A  
P<sup>1</sup>K K K

ac-S E T A P A A P A A A P P A E K<sup>1</sup>A P V<sup>1</sup>K<sup>1</sup>K<sup>1</sup>A<sup>1</sup>A<sup>1</sup>K<sup>1</sup>  
A<sup>1</sup>G<sup>1</sup>T P R K A S<sup>1</sup>G P P V<sup>1</sup>S<sup>1</sup>E<sup>1</sup>L I T K A V<sup>1</sup>A A S<sup>1</sup>K E<sup>1</sup>  
R S G V S L<sup>1</sup>A<sup>1</sup>A L K<sup>1</sup>K A L A A A G Y<sup>1</sup>D V E K N N S R  
I K L G L K S L V S K G T L V Q<sup>1</sup>T K G T G A S G S F  
K L N K K A A S G<sup>1</sup>E A K P K V K K A G G T K P K K P  
V G A A K K P K K A A G G A T P K K<sup>1</sup>S A K K T P K K  
A K K P A A A T V<sup>1</sup>T<sup>1</sup>K<sup>1</sup>K V A K<sup>1</sup>S<sup>1</sup>P K<sup>1</sup>K<sup>1</sup>A<sup>1</sup>K V A<sup>1</sup>K P K  
K A A K<sup>1</sup>S<sup>1</sup>A<sup>1</sup>A<sup>1</sup>K A V<sup>1</sup>K P K A A<sup>1</sup>K P K V V<sup>1</sup>K P K K A<sup>1</sup>A  
P<sup>1</sup>K K K

ac-S E T<sup>1</sup>A P A A P A A A P P A E K<sup>1</sup>V P<sup>1</sup>V<sup>1</sup>K<sup>1</sup>K<sup>1</sup>A<sup>1</sup>A<sup>1</sup>K<sup>1</sup>  
A<sup>1</sup>G<sup>1</sup>T P R<sup>1</sup>K<sup>1</sup>A S<sup>1</sup>G P P V<sup>1</sup>S<sup>1</sup>E<sup>1</sup>L I T<sup>1</sup>K<sup>1</sup>A<sup>1</sup>V<sup>1</sup>A<sup>1</sup>A<sup>1</sup>S<sup>1</sup>K<sup>1</sup>E<sup>1</sup>  
R<sup>1</sup>S<sup>1</sup>G<sup>1</sup>V<sup>1</sup>S<sup>1</sup>L<sup>1</sup>A<sup>1</sup>A<sup>1</sup>L<sup>1</sup>K<sup>1</sup>K<sup>1</sup>A<sup>1</sup>L A A A G Y<sup>1</sup>D V<sup>1</sup>E<sup>1</sup>K<sup>1</sup>N<sup>1</sup>N<sup>1</sup>S R  
I K<sup>1</sup>L<sup>1</sup>G<sup>1</sup>L K<sup>1</sup>S<sup>1</sup>L<sup>1</sup>V<sup>1</sup>S<sup>1</sup>K G T L V<sup>1</sup>Q<sup>1</sup>T K G T G A S G<sup>1</sup>S F<sup>1</sup>  
K L N K K A A S G<sup>1</sup>E A<sup>1</sup>K P<sup>1</sup>K V K K A G G T K P K<sup>1</sup>K P  
V G<sup>1</sup>A<sup>1</sup>A K<sup>1</sup>K P K<sup>1</sup>K<sup>1</sup>A A G G A<sup>1</sup>T P K K S A K K T P K<sup>1</sup>K  
A K K P A A A T V<sup>1</sup>T<sup>1</sup>K<sup>1</sup>K V A K<sup>1</sup>S<sup>1</sup>P K<sup>1</sup>K<sup>1</sup>A<sup>1</sup>K V A<sup>1</sup>K P<sup>1</sup>K  
K<sup>1</sup>A A K<sup>1</sup>S<sup>1</sup>A<sup>1</sup>A<sup>1</sup>K A V<sup>1</sup>K P K A A<sup>1</sup>K P<sup>1</sup>K V V<sup>1</sup>K P<sup>1</sup>K K A<sup>1</sup>A  
P<sup>1</sup>K K K

MCF-10A

H13ac\_s phase

ac-S E T<sup>1</sup>A P<sup>1</sup>L A P T I P A P A E K<sup>1</sup>T P V K<sup>1</sup>K<sup>1</sup>A<sup>1</sup>K<sup>1</sup>K A  
 G<sup>1</sup>A<sup>1</sup>T<sup>1</sup>A<sup>1</sup>G<sup>1</sup>K<sup>1</sup>R<sup>1</sup>K A S G P P V<sup>1</sup>S<sup>1</sup>E<sup>1</sup>L I T<sup>1</sup>K<sup>1</sup>A V<sup>1</sup>A A<sup>1</sup>S<sup>1</sup>K  
 E<sup>1</sup>R<sup>1</sup>S<sup>1</sup>G V S<sup>1</sup>L<sup>1</sup>A<sup>1</sup>A<sup>1</sup>L K<sup>1</sup>K<sup>1</sup>A<sup>1</sup>L A A A G<sup>1</sup>Y<sup>1</sup>D V<sup>1</sup>E<sup>1</sup>K<sup>1</sup>N<sup>1</sup>N<sup>1</sup>S  
 R I K<sup>1</sup>L<sup>1</sup>G<sup>1</sup>L K S L V<sup>1</sup>S K G T L V<sup>1</sup>Q<sup>1</sup>T<sup>1</sup>K G T G A S G<sup>1</sup>S  
 F<sup>1</sup>K L N K K A A S G<sup>1</sup>E G<sup>1</sup>K P K<sup>1</sup>A K K A G A A K P R K  
 P A G A A K K P K<sup>1</sup>K V A G A A T P K K<sup>1</sup>S I K K T P K<sup>1</sup>  
 K V K K P A T<sup>1</sup>A A<sup>1</sup>G<sup>1</sup>T<sup>1</sup>K<sup>1</sup>K V A K<sup>1</sup>S<sup>1</sup>A<sup>1</sup>K<sup>1</sup>K<sup>1</sup>V K<sup>1</sup>T P<sup>1</sup>Q P  
 K<sup>1</sup>K<sup>1</sup>A<sup>1</sup>A<sup>1</sup>K<sup>1</sup>S P A<sup>1</sup>K<sup>1</sup>A<sup>1</sup>K A P<sup>1</sup>K P K A A<sup>1</sup>K P K S G<sup>1</sup>K P K  
 V T<sup>1</sup>K<sup>1</sup>A<sup>1</sup>K<sup>1</sup>K A<sup>1</sup>A P<sup>1</sup>K K K

H14ac\_s phase

ac-S E T<sup>1</sup>A P<sup>1</sup>A A P A<sup>1</sup>A P<sup>1</sup>A P A E K<sup>1</sup>T P V K<sup>1</sup>K<sup>1</sup>A<sup>1</sup>R<sup>1</sup>K<sup>1</sup>S<sup>1</sup>  
 A<sup>1</sup>G<sup>1</sup>A<sup>1</sup>A<sup>1</sup>K<sup>1</sup>R<sup>1</sup>K<sup>1</sup>A<sup>1</sup>S<sup>1</sup>G P P V<sup>1</sup>S<sup>1</sup>E<sup>1</sup>L I T<sup>1</sup>K<sup>1</sup>A<sup>1</sup>V<sup>1</sup>A<sup>1</sup>A<sup>1</sup>S<sup>1</sup>K<sup>1</sup>E<sup>1</sup>  
 R<sup>1</sup>S<sup>1</sup>G V<sup>1</sup>S<sup>1</sup>L<sup>1</sup>A<sup>1</sup>A<sup>1</sup>L<sup>1</sup>K<sup>1</sup>K<sup>1</sup>A<sup>1</sup>L<sup>1</sup>A A A G<sup>1</sup>Y<sup>1</sup>D V<sup>1</sup>E<sup>1</sup>K<sup>1</sup>N<sup>1</sup>N<sup>1</sup>S R  
 I K<sup>1</sup>L<sup>1</sup>G<sup>1</sup>L K S<sup>1</sup>L<sup>1</sup>V<sup>1</sup>S<sup>1</sup>K G T L V<sup>1</sup>Q<sup>1</sup>T<sup>1</sup>K G T G A S G<sup>1</sup>S F<sup>1</sup>  
 K L N K K A A S G<sup>1</sup>E A<sup>1</sup>K P<sup>1</sup>K<sup>1</sup>A K K A<sup>1</sup>G<sup>1</sup>A A<sup>1</sup>K A K<sup>1</sup>K P  
 A G A A K<sup>1</sup>K P K<sup>1</sup>K<sup>1</sup>A T<sup>1</sup>G A A<sup>1</sup>T P K<sup>1</sup>K<sup>1</sup>S<sup>1</sup>A K K<sup>1</sup>T P<sup>1</sup>K<sup>1</sup>K  
 A K<sup>1</sup>K P A A A<sup>1</sup>A<sup>1</sup>G<sup>1</sup>A<sup>1</sup>K<sup>1</sup>K A K<sup>1</sup>S P<sup>1</sup>K<sup>1</sup>K<sup>1</sup>A<sup>1</sup>K<sup>1</sup>A A<sup>1</sup>K P K K  
 A P K S P<sup>1</sup>A<sup>1</sup>K<sup>1</sup>A K A V<sup>1</sup>K P K A A<sup>1</sup>K P K T A<sup>1</sup>K P<sup>1</sup>K A A<sup>1</sup>  
 K P<sup>1</sup>K<sup>1</sup>K A<sup>1</sup>A<sup>1</sup>K K K

H14acph\_s phase

ac-S E T<sup>1</sup>A P A A P A<sup>1</sup>A P A P A E K<sup>1</sup>T P V K<sup>1</sup>K<sup>1</sup>A<sup>1</sup>R<sup>1</sup>K<sup>1</sup>S<sup>1</sup>  
 A<sup>1</sup>G<sup>1</sup>A<sup>1</sup>A<sup>1</sup>K<sup>1</sup>R<sup>1</sup>K<sup>1</sup>A<sup>1</sup>S<sup>1</sup>G P P V<sup>1</sup>S<sup>1</sup>E<sup>1</sup>L I T<sup>1</sup>K<sup>1</sup>A<sup>1</sup>V<sup>1</sup>A<sup>1</sup>A<sup>1</sup>S<sup>1</sup>K<sup>1</sup>E<sup>1</sup>  
 R<sup>1</sup>S<sup>1</sup>G V<sup>1</sup>S<sup>1</sup>L<sup>1</sup>A<sup>1</sup>A<sup>1</sup>L<sup>1</sup>K<sup>1</sup>K<sup>1</sup>A<sup>1</sup>L<sup>1</sup>A A A G<sup>1</sup>Y<sup>1</sup>D V<sup>1</sup>E<sup>1</sup>K<sup>1</sup>N<sup>1</sup>N<sup>1</sup>S R  
 I K<sup>1</sup>L<sup>1</sup>G<sup>1</sup>L K S<sup>1</sup>L V S<sup>1</sup>K G T L V<sup>1</sup>Q<sup>1</sup>T<sup>1</sup>K G T G A S G<sup>1</sup>S F  
 K L N K K A A S G<sup>1</sup>E A<sup>1</sup>K P<sup>1</sup>K<sup>1</sup>A K K A<sup>1</sup>G<sup>1</sup>A A<sup>1</sup>K A K<sup>1</sup>K P  
 A G A A K<sup>1</sup>K P K<sup>1</sup>K<sup>1</sup>A T<sup>1</sup>G A A T P K K<sup>1</sup>S A K K T P K<sup>1</sup>K  
 A K K P A A A<sup>1</sup>A<sup>1</sup>G<sup>1</sup>A<sup>1</sup>K<sup>1</sup>K A K<sup>1</sup>S P<sup>1</sup>K<sup>1</sup>K<sup>1</sup>A<sup>1</sup>K<sup>1</sup>A A<sup>1</sup>K P K<sup>1</sup>K  
 A P K S P<sup>1</sup>A<sup>1</sup>K<sup>1</sup>A<sup>1</sup>K A V<sup>1</sup>K P K A A K P K T A<sup>1</sup>K P<sup>1</sup>K A A<sup>1</sup>  
 K P<sup>1</sup>K<sup>1</sup>K A<sup>1</sup>A<sup>1</sup>K K K

H14acph2\_s phase

ac-S E T<sup>1</sup>A P A A P A<sup>1</sup>A P A P A E K<sup>1</sup>T P V K<sup>1</sup>K<sup>1</sup>A<sup>1</sup>R<sup>1</sup>K<sup>1</sup>S<sup>1</sup>  
 A<sup>1</sup>G<sup>1</sup>A<sup>1</sup>A<sup>1</sup>K<sup>1</sup>R<sup>1</sup>K<sup>1</sup>A<sup>1</sup>S<sup>1</sup>G P P V<sup>1</sup>S<sup>1</sup>E<sup>1</sup>L I T<sup>1</sup>K<sup>1</sup>A<sup>1</sup>V<sup>1</sup>A<sup>1</sup>A<sup>1</sup>S<sup>1</sup>K<sup>1</sup>E<sup>1</sup>  
 R<sup>1</sup>S<sup>1</sup>G V S<sup>1</sup>L<sup>1</sup>A<sup>1</sup>A<sup>1</sup>L<sup>1</sup>K<sup>1</sup>K<sup>1</sup>A<sup>1</sup>L<sup>1</sup>A A A G<sup>1</sup>Y<sup>1</sup>D V<sup>1</sup>E<sup>1</sup>K<sup>1</sup>N<sup>1</sup>N<sup>1</sup>S R  
 I K<sup>1</sup>L<sup>1</sup>G<sup>1</sup>L K S<sup>1</sup>L<sup>1</sup>V<sup>1</sup>S<sup>1</sup>K G T L V<sup>1</sup>Q<sup>1</sup>T<sup>1</sup>K G T<sup>1</sup>G A S G<sup>1</sup>S F<sup>1</sup>  
 K L N<sup>1</sup>K K A A S G<sup>1</sup>E A<sup>1</sup>K P K A K K A G<sup>1</sup>A A<sup>1</sup>K A K K P  
 A G A A K K P K<sup>1</sup>K<sup>1</sup>A T<sup>1</sup>G A A T P K K<sup>1</sup>S A K K T P K<sup>1</sup>K<sup>1</sup>  
 A K K P A<sup>1</sup>A A<sup>1</sup>A<sup>1</sup>G<sup>1</sup>A<sup>1</sup>K<sup>1</sup>K A K<sup>1</sup>S P<sup>1</sup>K<sup>1</sup>K<sup>1</sup>A<sup>1</sup>K A A<sup>1</sup>K P K K  
 A P K<sup>1</sup>S P<sup>1</sup>A<sup>1</sup>K<sup>1</sup>A K A V<sup>1</sup>K P<sup>1</sup>K A A<sup>1</sup>K P K T A<sup>1</sup>K P<sup>1</sup>K A A<sup>1</sup>  
 K P<sup>1</sup>K<sup>1</sup>K A<sup>1</sup>A<sup>1</sup>K K K



MCF-10A m phase

H14ac\_m phase

ac-S E T A P A A P A A P A P A E K<sup>1</sup>T P V K<sup>1</sup>K<sup>1</sup>A<sup>1</sup>R<sup>1</sup>K<sup>1</sup>S<sup>1</sup>  
 A<sup>1</sup>G<sup>1</sup>A<sup>1</sup>A<sup>1</sup>K<sup>1</sup>R<sup>1</sup>K<sup>1</sup>A<sup>1</sup>S<sup>1</sup>G P P V<sup>1</sup>S<sup>1</sup>E<sup>1</sup>L I T K<sup>1</sup>A V<sup>1</sup>A<sup>1</sup>S<sup>1</sup>K<sup>1</sup>E<sup>1</sup>  
 R S G V S L<sup>1</sup>A A L K K A L A A A G Y<sup>1</sup>D V E K N N S R  
 I K L G L K S L V S K G T L V Q T K G T G A S G S F  
 K L N K K A A S G<sup>1</sup>E A K P K A K K A G A A K A K K P  
 A G A A K K P K K<sup>1</sup>A T G A A T P K K S A K K T P K K  
 A K K P A A A A G A<sup>1</sup>K K A K<sup>1</sup>S<sup>1</sup>P<sup>1</sup>K<sup>1</sup>K<sup>1</sup>A<sup>1</sup>K<sup>1</sup>A<sup>1</sup>K<sup>1</sup>P K K  
 A P K S P A<sup>1</sup>K<sup>1</sup>A<sup>1</sup>K A V<sup>1</sup>K<sup>1</sup>P K A A<sup>1</sup>K<sup>1</sup>P K T A<sup>1</sup>K<sup>1</sup>P K A A<sup>1</sup>  
 K P<sup>1</sup>K<sup>1</sup>K<sup>1</sup>A<sup>1</sup>A<sup>1</sup>A<sup>1</sup>K K K

H14acph\_m phase

ac-S E T A P A A P A A P A P A E K<sup>1</sup>T P V K<sup>1</sup>K<sup>1</sup>A<sup>1</sup>R<sup>1</sup>K<sup>1</sup>S<sup>1</sup>  
 A<sup>1</sup>G<sup>1</sup>A<sup>1</sup>A<sup>1</sup>K<sup>1</sup>R<sup>1</sup>K<sup>1</sup>A<sup>1</sup>S<sup>1</sup>G P P V<sup>1</sup>S<sup>1</sup>E<sup>1</sup>L I T K A V A A S<sup>1</sup>K<sup>1</sup>E<sup>1</sup>  
 R S G V S L<sup>1</sup>A<sup>1</sup>A L K K A L A A A G Y<sup>1</sup>D V E K N N S R  
 I K L G L K S L V S K G T L V Q T K G T G A S G S F  
 K L N K K A A S G<sup>1</sup>E A K P K A K K A G A A K A K K P  
 A G A A K K P K K A T G A A T P K K S A K K T P K K  
 A K K P A A A<sup>1</sup>A<sup>1</sup>G<sup>1</sup>A<sup>1</sup>K K<sup>1</sup>A<sup>1</sup>K<sup>1</sup>S<sup>1</sup>P<sup>1</sup>K<sup>1</sup>K<sup>1</sup>A<sup>1</sup>K<sup>1</sup>A<sup>1</sup>K<sup>1</sup>P K K  
 A P K S P A<sup>1</sup>K<sup>1</sup>A<sup>1</sup>K A V<sup>1</sup>K<sup>1</sup>P K A A<sup>1</sup>K<sup>1</sup>P K T A<sup>1</sup>K<sup>1</sup>P K A A<sup>1</sup>  
 K P<sup>1</sup>K<sup>1</sup>K<sup>1</sup>A<sup>1</sup>A<sup>1</sup>A<sup>1</sup>K K K

H14acph2\_m phase

ac-S E T<sup>1</sup>A P A A P A A P A P A E K<sup>1</sup>T P V K<sup>1</sup>K<sup>1</sup>A<sup>1</sup>R<sup>1</sup>K<sup>1</sup>S<sup>1</sup>  
 A<sup>1</sup>G<sup>1</sup>A<sup>1</sup>A<sup>1</sup>K<sup>1</sup>R<sup>1</sup>K<sup>1</sup>A<sup>1</sup>S<sup>1</sup>G P P V<sup>1</sup>S<sup>1</sup>E<sup>1</sup>L I T K<sup>1</sup>A V<sup>1</sup>A<sup>1</sup>S<sup>1</sup>K<sup>1</sup>E<sup>1</sup>  
 R<sup>1</sup>S G V S L<sup>1</sup>A<sup>1</sup>A L K<sup>1</sup>K<sup>1</sup>A L A A A G Y<sup>1</sup>D V<sup>1</sup>E<sup>1</sup>K<sup>1</sup>N<sup>1</sup>N<sup>1</sup>S R  
 I K<sup>1</sup>L G L K S<sup>1</sup>L V S K G T L V Q<sup>1</sup>T K G T G A S G S F  
 K L N K K A A S G<sup>1</sup>E A K P K A K K A G A A K A K K P  
 A G A A K K P K K<sup>1</sup>A T G A A T P K K S A K K T P K K  
 A K K P A A A<sup>1</sup>A<sup>1</sup>G<sup>1</sup>A<sup>1</sup>K K<sup>1</sup>A<sup>1</sup>K<sup>1</sup>S<sup>1</sup>P<sup>1</sup>K<sup>1</sup>K<sup>1</sup>A<sup>1</sup>K<sup>1</sup>A<sup>1</sup>K<sup>1</sup>P K K  
 A P K<sup>1</sup>S<sup>1</sup>P<sup>1</sup>A<sup>1</sup>K<sup>1</sup>A<sup>1</sup>K A V<sup>1</sup>K<sup>1</sup>P K A A<sup>1</sup>K<sup>1</sup>P K T A<sup>1</sup>K<sup>1</sup>P K A A<sup>1</sup>  
 K P<sup>1</sup>K<sup>1</sup>K<sup>1</sup>A<sup>1</sup>A<sup>1</sup>A<sup>1</sup>K K K

H14acph3\_m phase

ac-S E T<sup>1</sup>A P A A P A<sup>1</sup>A P A P<sup>1</sup>A E<sup>1</sup>K<sup>1</sup>T<sup>ph</sup> P V K<sup>1</sup>K<sup>1</sup>K A R<sup>1</sup>K<sup>1</sup>S<sup>1</sup>  
 A<sup>1</sup>G<sup>1</sup>A<sup>1</sup>A<sup>1</sup>K<sup>1</sup>R<sup>1</sup>K<sup>1</sup>A<sup>1</sup>S<sup>1</sup>G P P V<sup>1</sup>S<sup>1</sup>E<sup>1</sup>L I T K A V<sup>1</sup>A<sup>1</sup>A<sup>1</sup>S<sup>1</sup>K<sup>1</sup>E<sup>1</sup>  
 R<sup>1</sup>S G V<sup>1</sup>S<sup>1</sup>L<sup>1</sup>A<sup>1</sup>A L<sup>1</sup>K<sup>1</sup>K<sup>1</sup>A<sup>1</sup>L<sup>1</sup>A A A G Y<sup>1</sup>D V<sup>1</sup>E<sup>1</sup>K<sup>1</sup>N<sup>1</sup>N<sup>1</sup>S R  
 I K<sup>1</sup>L<sup>1</sup>G<sup>1</sup>L K S L<sup>1</sup>V<sup>1</sup>S<sup>1</sup>K G T L V Q<sup>1</sup>T<sup>1</sup>K G T G A S G<sup>1</sup>S<sup>1</sup>F<sup>1</sup>  
 K L N K K A A S G<sup>1</sup>E A K P K A K K A G<sup>1</sup>A A K A K K P  
 A G A A K K P K<sup>1</sup>K<sup>1</sup>A T G A A T P K<sup>1</sup>K<sup>1</sup>S A K K T P K<sup>1</sup>K<sup>1</sup>  
 A K K P A A A<sup>1</sup>A<sup>1</sup>G<sup>1</sup>A<sup>1</sup>K K<sup>1</sup>A<sup>1</sup>K<sup>1</sup>S<sup>1</sup>P<sup>1</sup>K<sup>1</sup>K<sup>1</sup>A<sup>1</sup>K<sup>1</sup>A<sup>1</sup>K<sup>1</sup>P K K<sup>1</sup>  
 A P K<sup>1</sup>S<sup>1</sup>P<sup>1</sup>A<sup>1</sup>K<sup>1</sup>A<sup>1</sup>K A V<sup>1</sup>K<sup>1</sup>P K A A<sup>1</sup>K<sup>1</sup>P K T A<sup>1</sup>K<sup>1</sup>P K A A<sup>1</sup>  
 K P<sup>1</sup>K<sup>1</sup>K<sup>1</sup>A<sup>1</sup>A<sup>1</sup>A<sup>1</sup>K K K

H14acph4\_m phase

ac-S E T A P A A P A A P A P A E K<sup>1</sup>T<sup>ph</sup> P V K<sup>1</sup>K<sup>1</sup>K A R<sup>1</sup>K<sup>1</sup>S<sup>1</sup>  
 A<sup>1</sup>G<sup>1</sup>A<sup>1</sup>A<sup>1</sup>K<sup>1</sup>R<sup>1</sup>K<sup>1</sup>A<sup>1</sup>S<sup>1</sup>G P P V<sup>1</sup>S<sup>1</sup>E<sup>1</sup>L I T K<sup>1</sup>A V<sup>1</sup>A<sup>1</sup>A<sup>1</sup>S<sup>1</sup>K<sup>1</sup>E<sup>1</sup>  
 R<sup>1</sup>S G V<sup>1</sup>S<sup>1</sup>L<sup>1</sup>A<sup>1</sup>A L<sup>1</sup>K<sup>1</sup>K<sup>1</sup>A<sup>1</sup>L<sup>1</sup>A A A G Y<sup>1</sup>D V<sup>1</sup>E<sup>1</sup>K<sup>1</sup>N<sup>1</sup>N<sup>1</sup>S R  
 I K<sup>1</sup>L<sup>1</sup>G<sup>1</sup>L K S L<sup>1</sup>V<sup>1</sup>S<sup>1</sup>K G T L V Q<sup>1</sup>T<sup>1</sup>K G T G A S G<sup>1</sup>S<sup>1</sup>F<sup>1</sup>  
 K L N K K A A S G<sup>1</sup>E A K P K A K K A G<sup>1</sup>A A K A K K P  
 A G A A K K P K<sup>1</sup>K<sup>1</sup>A T G A A T<sup>ph</sup> P K<sup>1</sup>K<sup>1</sup>S A K K T P K<sup>1</sup>K<sup>1</sup>  
 A K K P A A A<sup>1</sup>A<sup>1</sup>G<sup>1</sup>A<sup>1</sup>K K A K<sup>1</sup>S<sup>1</sup>P<sup>1</sup>K<sup>1</sup>K<sup>1</sup>A<sup>1</sup>K<sup>1</sup>A<sup>1</sup>K<sup>1</sup>P K K  
 A P K<sup>1</sup>S<sup>1</sup>P<sup>1</sup>A<sup>1</sup>K<sup>1</sup>A<sup>1</sup>K A V<sup>1</sup>K<sup>1</sup>P K A A<sup>1</sup>K<sup>1</sup>P K T A<sup>1</sup>K<sup>1</sup>P K A A<sup>1</sup>  
 K P<sup>1</sup>K<sup>1</sup>K<sup>1</sup>A<sup>1</sup>A<sup>1</sup>A<sup>1</sup>K K K

H14acph5\_m phase

ac-S E T<sup>1</sup>A P A A P A A P A P A E K<sup>1</sup>T<sup>ph</sup> P V K<sup>1</sup>K<sup>1</sup>K A R<sup>1</sup>K<sup>1</sup>S<sup>1</sup>  
 A<sup>1</sup>G<sup>1</sup>A<sup>1</sup>A<sup>1</sup>K<sup>1</sup>R<sup>1</sup>K<sup>1</sup>A<sup>1</sup>S<sup>1</sup>G P P V<sup>1</sup>S<sup>1</sup>E<sup>1</sup>L I T K A V A A S<sup>1</sup>K<sup>1</sup>E<sup>1</sup>  
 R S G V S L A A L K K A L A A A G Y D V E K N N S R  
 I K L G L K S L V S K G T L V Q T K G T G A S G S F  
 K L N K K A A S G E A K P K A K K A G A A K A K K P  
 A G A A K K P K K A T G A A T<sup>ph</sup> P K K S A K K T<sup>ph</sup> P K<sup>1</sup>K<sup>1</sup>  
 A K<sup>1</sup>K<sup>1</sup>P A A A<sup>1</sup>A<sup>1</sup>G<sup>1</sup>A<sup>1</sup>K K<sup>1</sup>A<sup>1</sup>K<sup>1</sup>S<sup>1</sup>P<sup>1</sup>K<sup>1</sup>K<sup>1</sup>A<sup>1</sup>K<sup>1</sup>A<sup>1</sup>K<sup>1</sup>P K K  
 A P K<sup>1</sup>S<sup>1</sup>P<sup>1</sup>A<sup>1</sup>K<sup>1</sup>A<sup>1</sup>K A V<sup>1</sup>K<sup>1</sup>P K A A<sup>1</sup>K<sup>1</sup>P K T A<sup>1</sup>K<sup>1</sup>P K A A<sup>1</sup>  
 K P<sup>1</sup>K<sup>1</sup>K<sup>1</sup>A<sup>1</sup>A<sup>1</sup>A<sup>1</sup>K K K

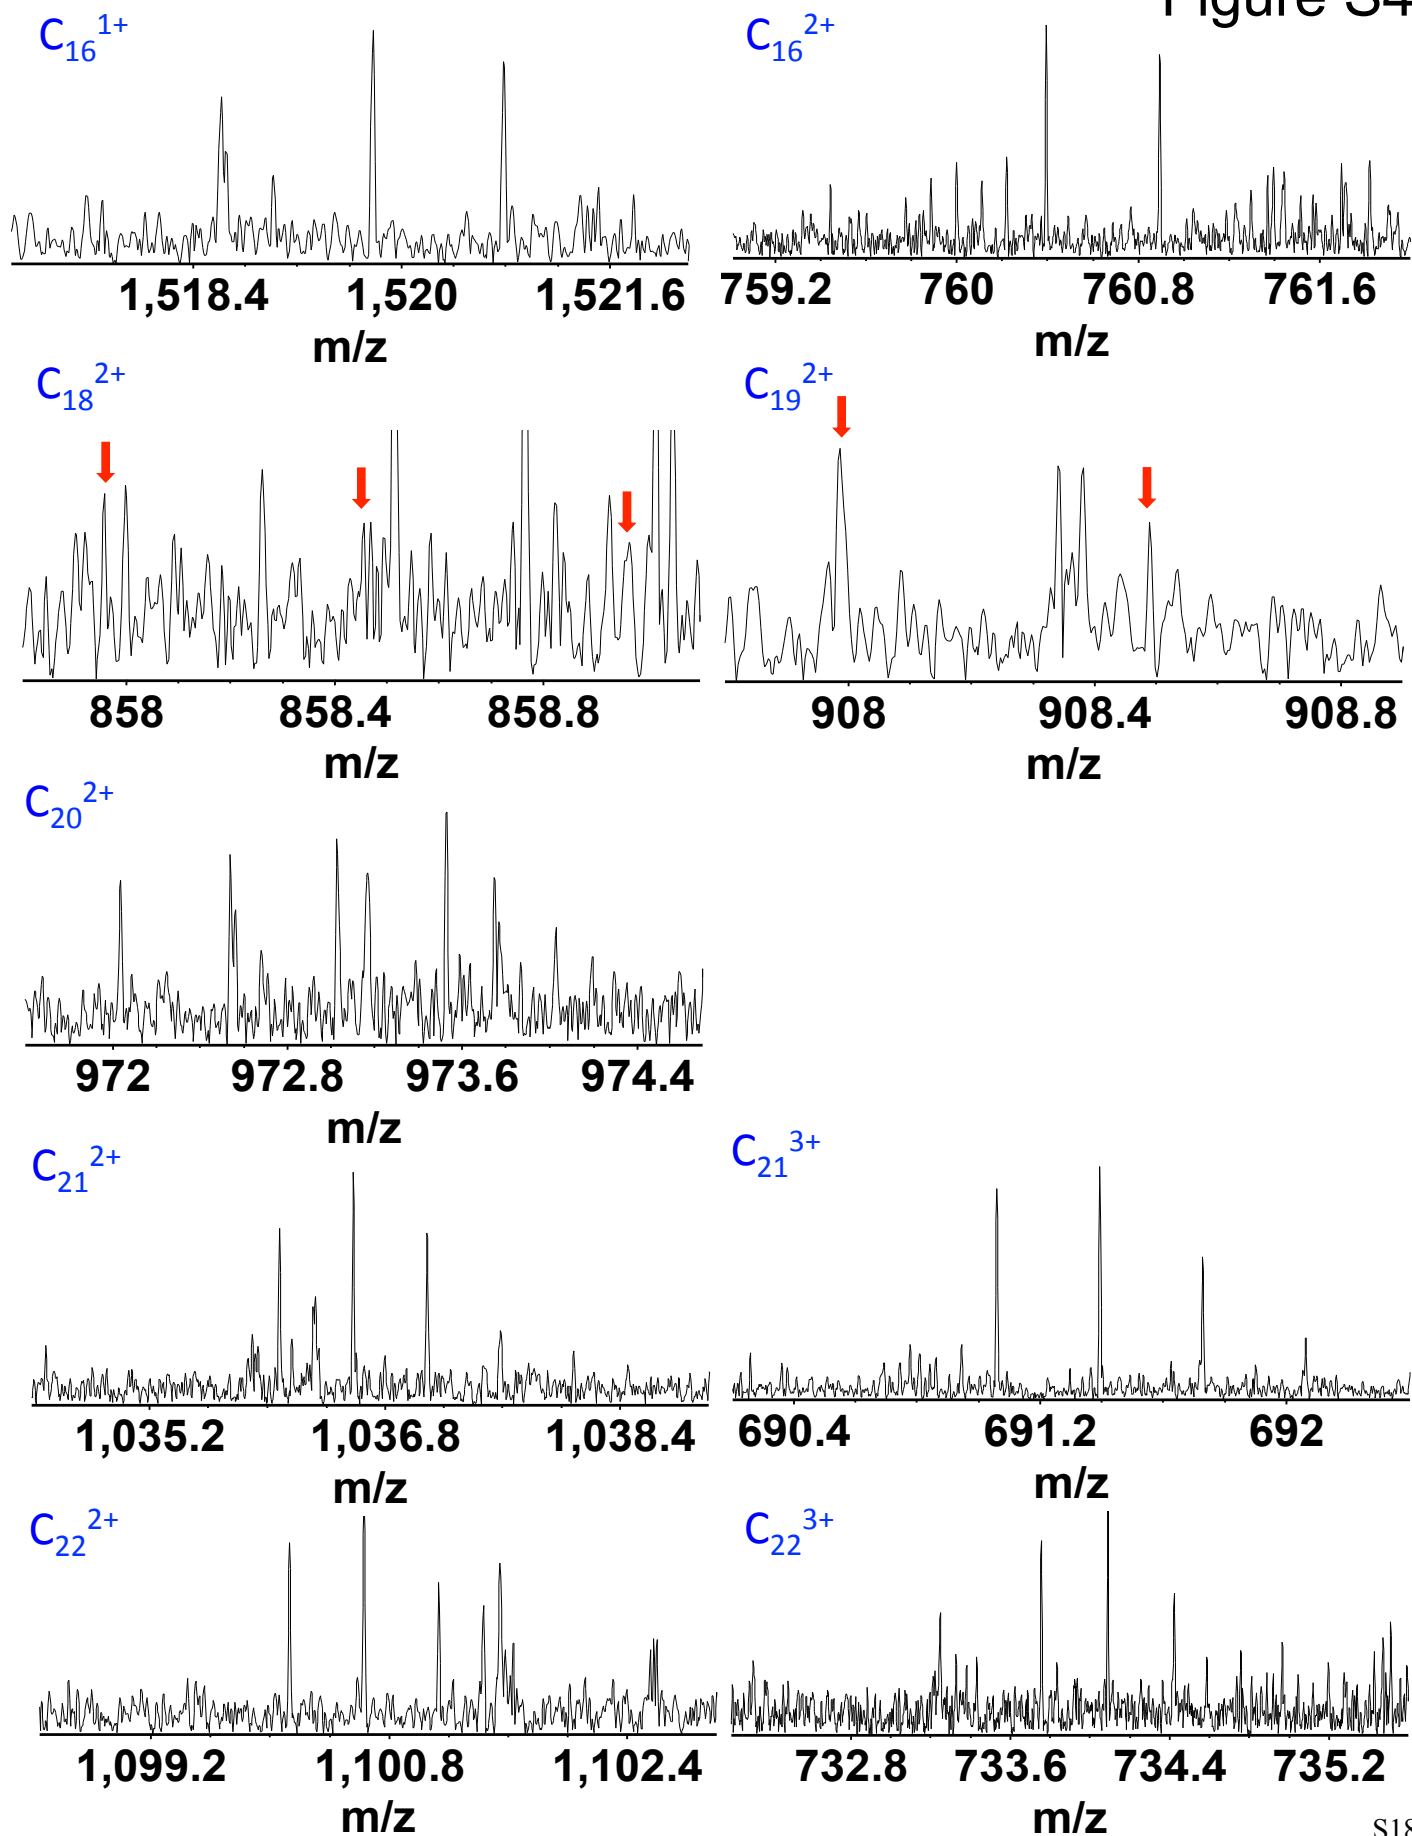

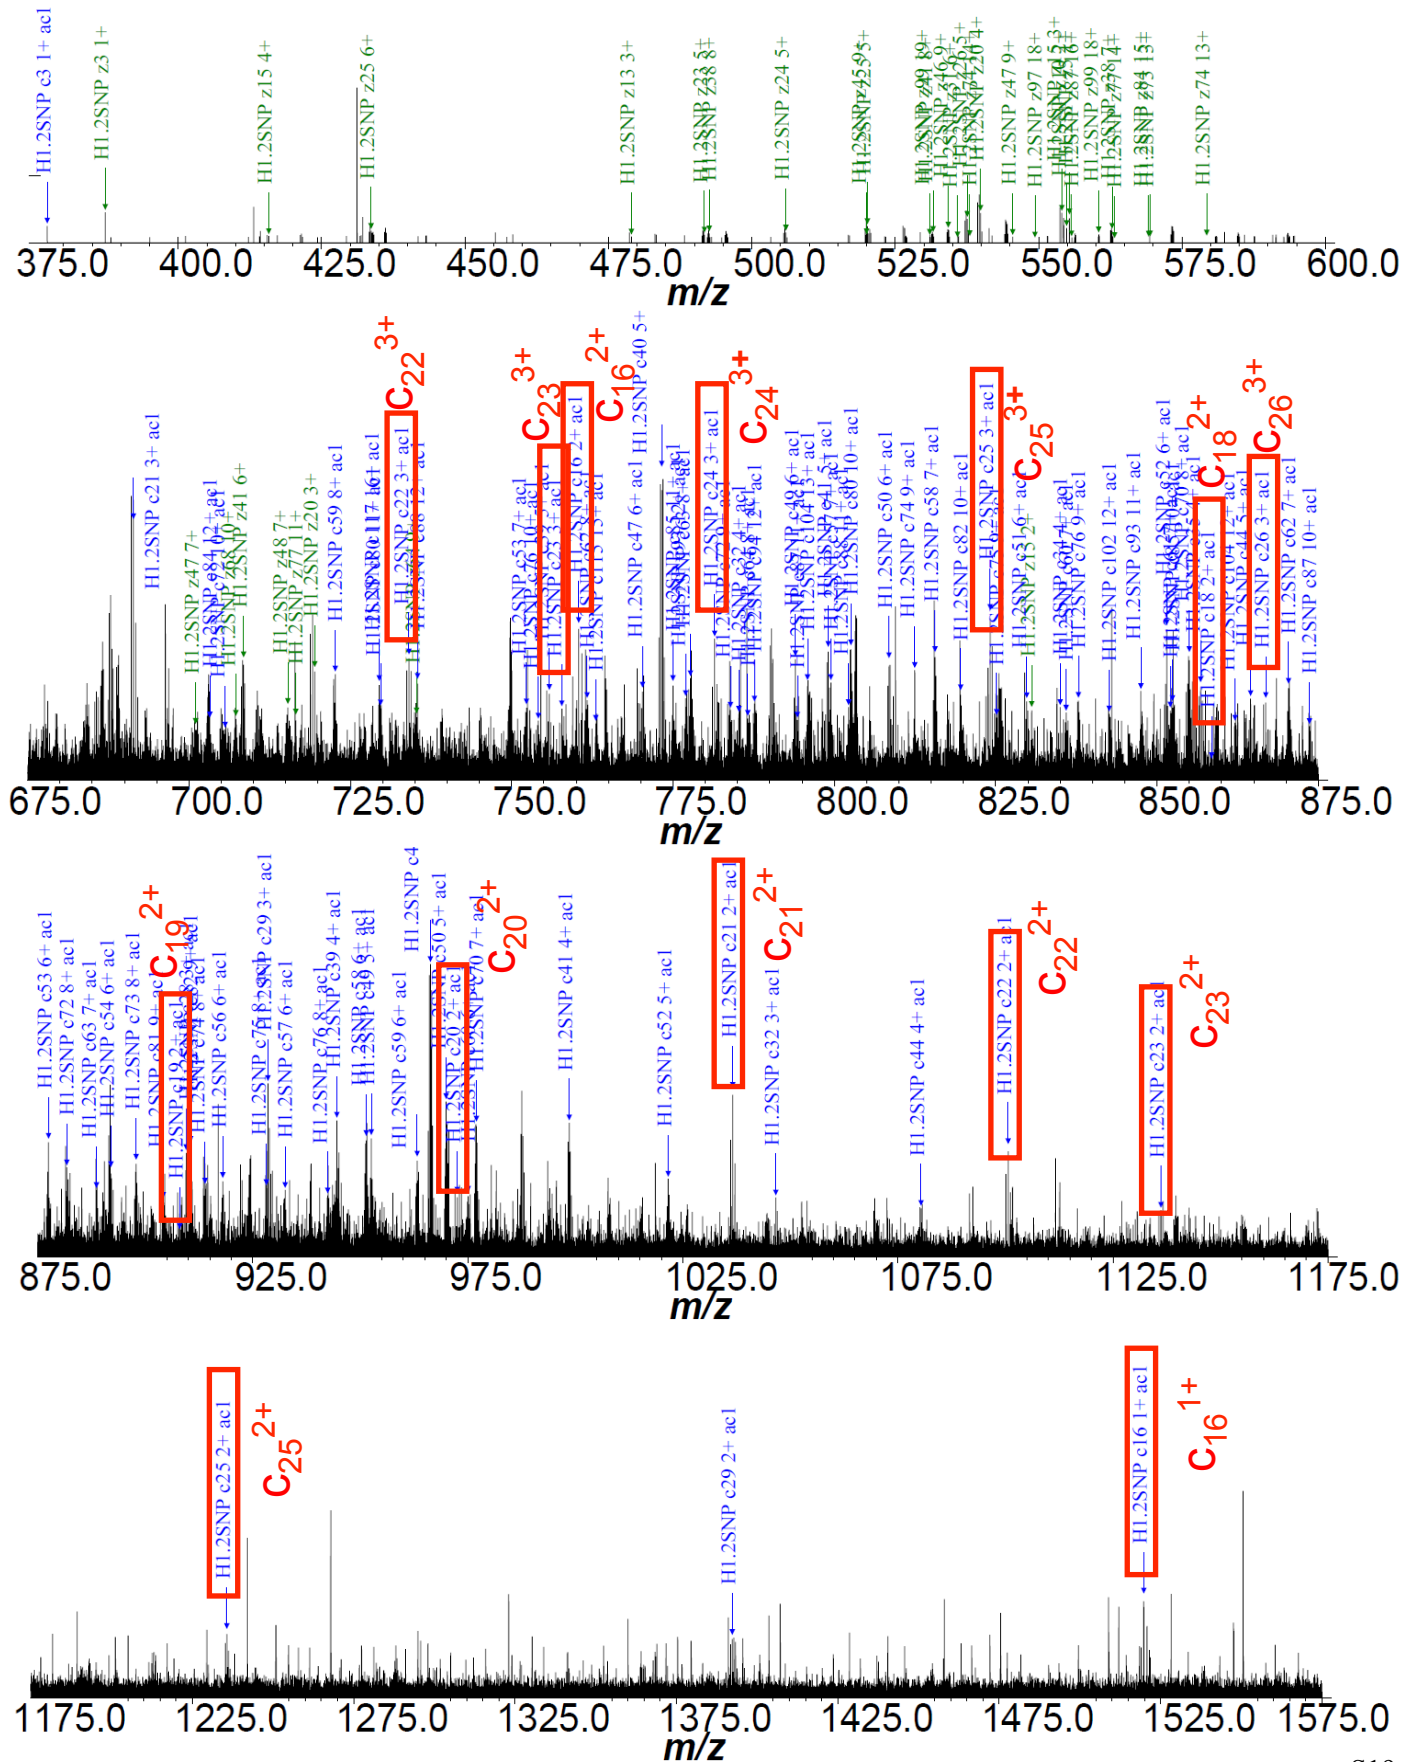

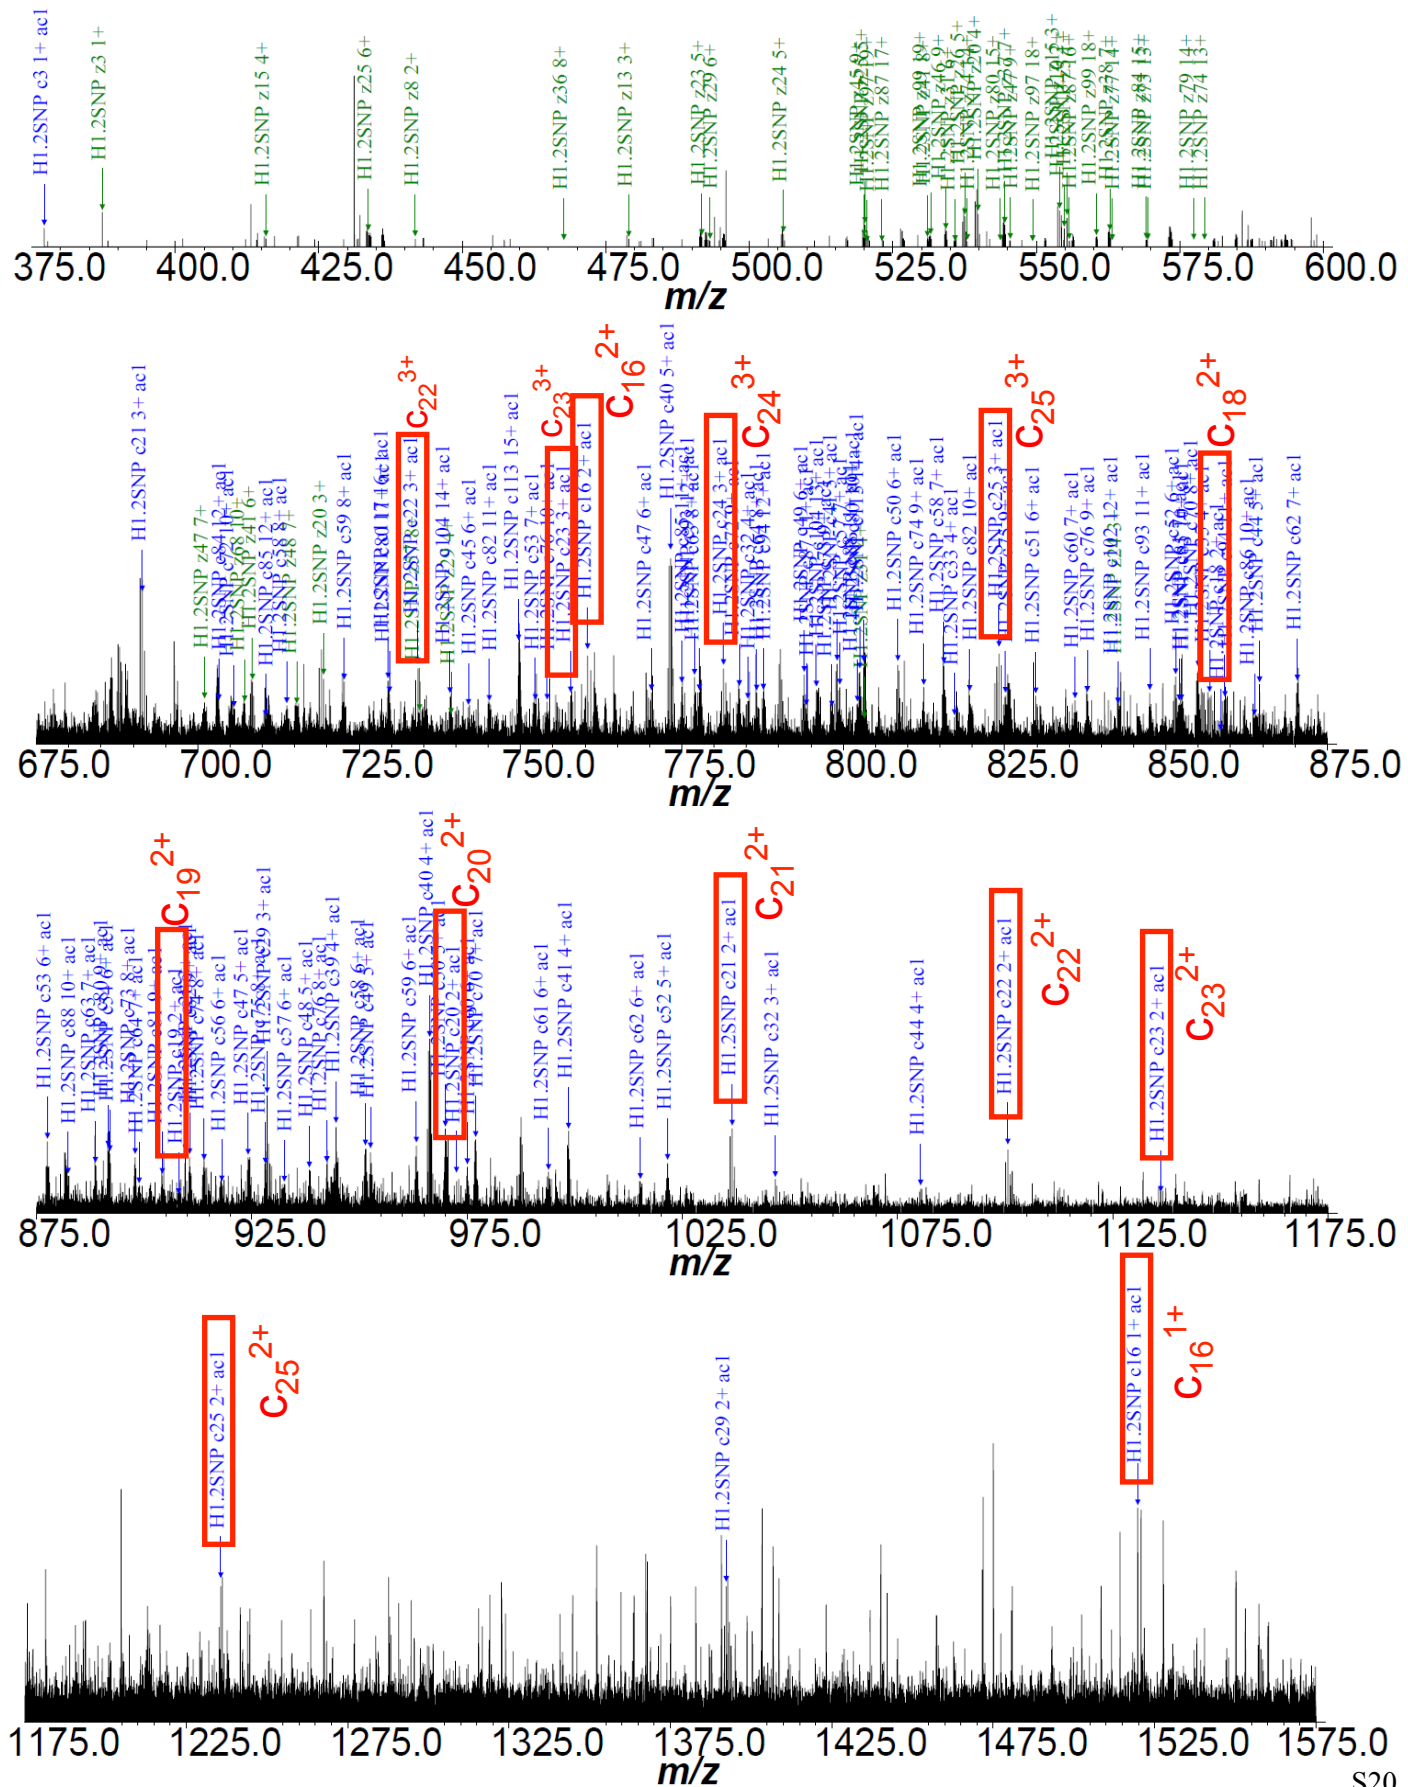

Asynchronous H1.2SNP A18V N<sub>α</sub>-ac

## Figure S7

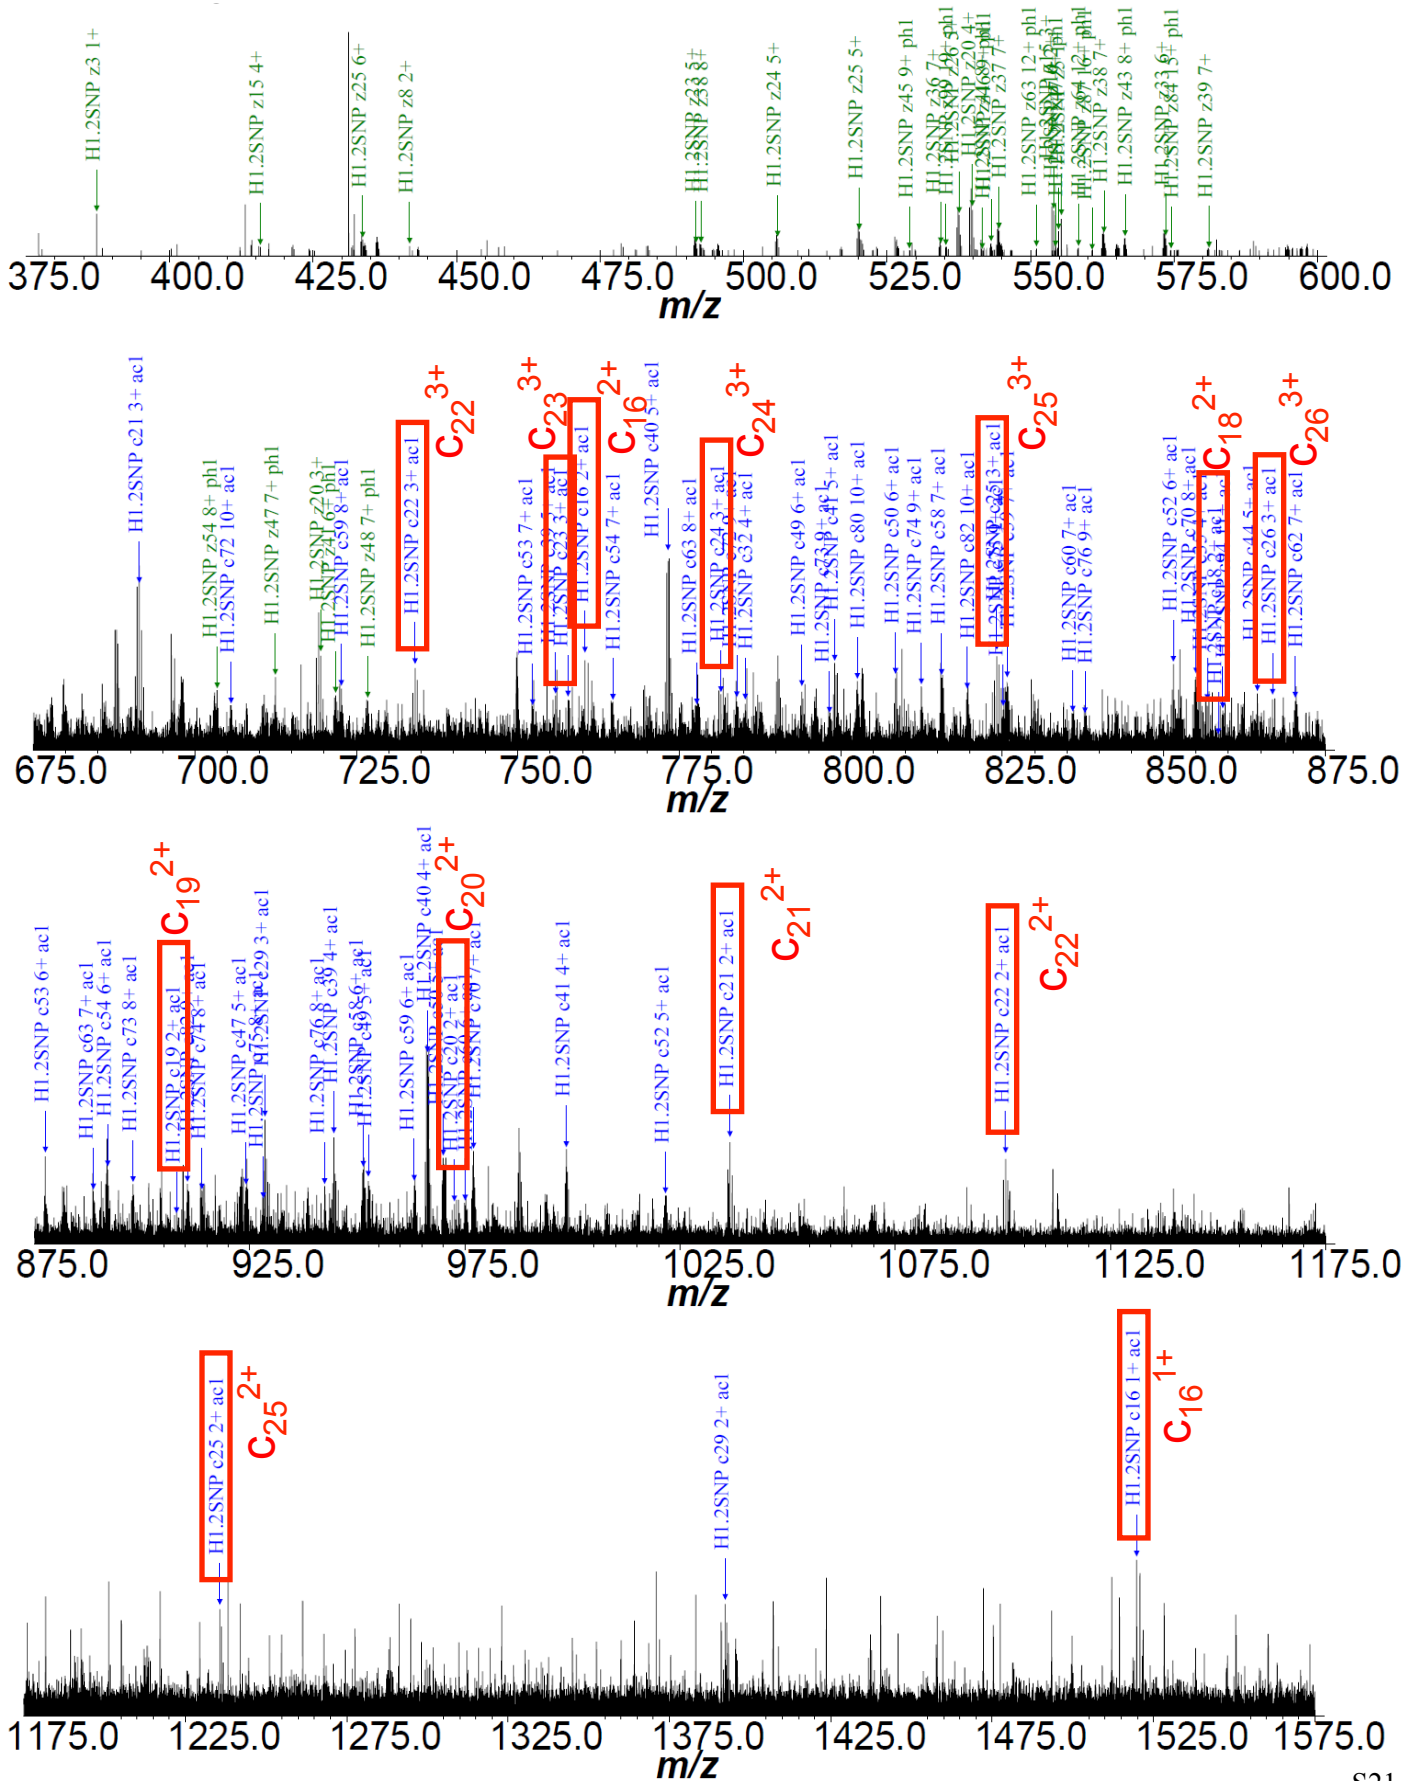

Supplement: supp_M114.046441_mcp.M114.046441-1.pdf [file supp_M114.046441_mcp.M114.046441-1.pdf]
